# Supplementary material for: Gestational Exposure to Phthalates and Social Responsiveness Scores in Children Using Quantile Regression: The EARLI and HOME Studies
Source: PubMed Central journal article supplement (PMC7908417; doi:10.3390/ijerph18031254), 2021-01-30
Supplement: ijerph-18-01254-s001.pdf [file ijerph-18-01254-s001.pdf]

Supplemental Material

**Gestational Exposure to Phthalates and Social Responsiveness Scores in Children Using  
Quantile Regression: The EARLI and HOME Studies**

Marisa A. Patti, Craig Newschaffer, Melissa Eliot, Ghassan B. Hamra, Aimin Chen, Lisa A Croen, Margaret Daniele Fallin, Irva Hertz-Picciotto, Geetika Kalloo, Jane Khoury, Bruce P. Lanphear, Kristen Lyall, Kimberly Yolton, and Joseph M. Braun

CONTENTS

---

|                                                                                                                                                                                                                           |    |
|---------------------------------------------------------------------------------------------------------------------------------------------------------------------------------------------------------------------------|----|
| <b>Table S1.</b> Study Sample Characteristics and Mean Child SRS Total T-Scores According to Covariates in Full Cohort Samples Compared to Analytic Sample.....                                                           | 2  |
| <b>Table S2.</b> Study Sample Characteristics and Median Maternal Urinary Phthalate Concentrations According to Covariates.....                                                                                           | 3  |
| <b>Table S3.</b> Univariate statistics of repeated Maternal Urinary Concentrations of Phthalate Metabolites.....                                                                                                          | 5  |
| <b>Table S4.</b> Pearson correlation coefficients between gestational urinary phthalate metabolites....                                                                                                                   | 6  |
| <b>Table S5.</b> Intra-class correlation coefficients for gestational urinary phthalate metabolites.....                                                                                                                  | 7  |
| <b>Table 6:</b> Unadjusted and adjusted differences in Child SRS T-Scores Per 10-fold Increase in Gestational Urinary Phthalate Metabolite Concentrations at Quantiles of SRS T-Scores.....                               | 8  |
| <b>Table S7:</b> Unadjusted and Adjusted Differences in Children’s SRS T-Scores Per 10-fold Increase in Gestational Urinary Phthalate Metabolite Concentrations Using Linear Regression...                                | 10 |
| <b>Table S8.</b> Unadjusted and Adjusted Differences in Children’s SRS T-Scores Per 10-fold Increase in Gestational Urinary Phthalate Metabolite Concentrations Using Quantile Regression, Stratified by Child Sex.....   | 11 |
| <b>Table S9.</b> Unadjusted and adjusted differences in Child SRS raw scores at 3 to 8 Years Per 10-fold Increase in Gestational Urinary Phthalate Metabolite Concentrations at Quantiles of SRS Raw Scores.....          | 13 |
| <b>Table S10:</b> Adjusted differences in Child SRS T-Scores Per 10-fold Increase in Gestational Urinary Monobenzyl Phthalate Metabolite Concentrations at Quantiles of SRS T-Scores.....                                 | 15 |
| <b>Figure S1.</b> Flow Chart of Participant Selection to Final Sample Size.....                                                                                                                                           | 16 |
| <b>Figure S2.</b> Directed Acyclic Graph used to Select Covariates for our Primary Analysis in the Association Between Maternal Urinary Phthalate Concentrations During Gestation and Child SRS Scores.....               | 17 |
| <b>Figure S3.</b> Directed Acyclic Graph used to Select Covariates for our Primary and Secondary Analysis in the Association Between Maternal Urinary Phthalate Concentrations During Gestation and Child SRS Scores..... | 18 |
| <b>Figure S4.</b> Kernel density plot of distributions of Children’s SRS T-Score.....                                                                                                                                     | 19 |
| <b>Figure S5.</b> Adjusted Differences in Children’s SRS T-Scores Per 10-fold Increase in Gestational Urinary Phthalate Concentrations Using Quantile Regression.....                                                     | 20 |

**Table S1.** Study sample characteristics and mean child SRS total T-scores at 3 to 8 years according to covariates in full <sup>a</sup> cohort samples compared to analytic sample: the EARLI (2009–2012) and HOME Studies (2003–2006).

| Variable                         | EARLI           |             | HOME            |             |                 |             |                 |             |
|----------------------------------|-----------------|-------------|-----------------|-------------|-----------------|-------------|-----------------|-------------|
|                                  | Analytic Sample | Full Sample | SRS T-Scores    |             | Analytic Sample | Full Sample | SRS T-Scores    |             |
|                                  |                 |             | Analytic Sample | Full Sample |                 |             | Analytic Sample | Full Sample |
|                                  | N (%)           |             | Mean (SD)       |             | N (%)           |             | Mean (SD)       |             |
| Overall                          | 140 (100)       | 176 (100)   | 48 (11)         | 48 (11)     | 276 (100)       | 283 (100)   | 52 (10)         | 52 (10)     |
| Maternal Age                     |                 |             |                 |             |                 |             |                 |             |
| <25 years                        | 2 (1)           | 8 (5)       | 48 (1.4)        | 55 (11)     | 59 (21)         | 62 (22)     | 57 (12)         | 57 (12)     |
| 25 - <35 years                   | 68 (49)         | 85 (48)     | 50 (13)         | 50 (13)     | 170 (62)        | 174 (61)    | 50 (8.1)        | 50 (8.1)    |
| 35+ years                        | 70 (50)         | 83 (47)     | 46 (7.6)        | 46 (8.1)    | 47 (17)         | 52 (18)     | 52 (13)         | 51 (13)     |
| Maternal Race                    |                 |             |                 |             |                 |             |                 |             |
| White                            | 95 (68)         | 110 (63)    | 48 (10)         | 48 (11)     | 178 (64)        | 183 (65)    | 49 (8.5)        | 49 (8.5)    |
| Non-White                        | 45 (32)         | 66 (38)     | 48 (12)         | 49 (11)     | 98 (36)         | 100 (35)    | 57 (12)         | 56 (12)     |
| Maternal Education               |                 |             |                 |             |                 |             |                 |             |
| High School or less              | 14 (10)         | 25 (14)     | 50 (10)         | 51 (9.3)    | 64 (23)         | 65 (23)     | 58 (12)         | 58 (12)     |
| Some College                     | 40 (29)         | 50 (28)     | 53 (15)         | 53 (14)     | 75 (27)         | 76 (27)     | 53 (9.4)        | 53 (9.4)    |
| Completed College                | 86 (61)         | 107 (61)    | 45 (7.5)        | 46 (8.3)    | 137 (50)        | 144 (51)    | 48 (8.3)        | 48 (8.2)    |
| Annual Income                    |                 |             |                 |             |                 |             |                 |             |
| <\$30,000                        | 15 (11)         | 29 (16)     | 53 (17)         | 55 (14)     | 87 (32)         | 89 (31)     | 58 (12)         | 58 (12)     |
| \$30,000 - \$75,000              | 42 (30)         | 50 (28)     | 50 (12)         | 49 (12)     | 87 (32)         | 90 (32)     | 50 (8.9)        | 50 (8.8)    |
| ≥\$75,000                        | 83 (59)         | 97 (55)     | 46 (7.9)        | 46 (8.7)    | 102 (36)        | 104 (37)    | 47 (7.4)        | 47 (7.4)    |
| Maternal Smoking <sup>b, c</sup> |                 |             |                 |             |                 |             |                 |             |
| Non-Smoking                      | 132 (94)        | 148 (84)    | 47 (10)         | 48 (9.9)    | 245 (89)        | 252 (89)    | 52 (11)         | 51 (10)     |
| Active Smoking                   | 8 (6)           | 8 (5)       | 60 (19)         | 60 (19)     | 31 (11)         | 31 (11)     | 55 (8.7)        | 55 (8.7)    |
| Parity <sup>d</sup>              |                 |             |                 |             |                 |             |                 |             |
| 0                                | --              | --          | --              | --          | 128 (46)        | 131 (46)    | 51 (10)         | 51 (10)     |
| 1                                | 66 (47)         | 84 (48)     | 49 (12)         | 49 (12)     | 86 (31)         | 93 (33)     | 51 (10)         | 51 (10)     |
| 2 +                              | 74 (53)         | 95 (54)     | 47 (10)         | 47 (10)     | 62 (23)         | 65 (23)     | 55 (11)         | 55 (11)     |
| Pre-pregnancy BMI <sup>e</sup>   |                 |             |                 |             |                 |             |                 |             |
| Normal/Underweight               | 54 (39)         | 73 (41)     | 45 (8.5)        | 46 (8.7)    | 142 (51)        | 149 (53)    | 50 (11)         | 50 (11)     |
| Overweight                       | 40 (29)         | 56 (32)     | 47 (9.0)        | 47 (9.6)    | 69 (25)         | 76 (27)     | 51 (8.2)        | 51 (8.2)    |
| Obese                            | 46 (33)         | 61 (35)     | 52 (13)         | 52 (13)     | 65 (24)         | 72 (25)     | 55 (12)         | 55 (12)     |
| Child Sex                        |                 |             |                 |             |                 |             |                 |             |
| Male                             | 77 (55)         | 97 (55)     | 50 (13)         | 51 (13)     | 123 (45)        | 126 (45)    | 51 (9.7)        | 51 (9.6)    |
| Female                           | 63 (45)         | 79 (45)     | 45 (6.9)        | 45 (6.8)    | 153 (55)        | 157 (55)    | 53 (11)         | 53 (11)     |

BMI: body mass index, EARLI: Early Autism Risk Longitudinal Investigation Study, HOME: Health Outcomes and Measures of the Environment Study, SRS: Social Responsiveness Scale

<sup>a</sup>Note that values may not sum to the full sample size due to missing information from subsets of the original full sample

<sup>b</sup>Maternal smoking during pregnancy for EARLI was based on maternal urinary cotinine concentrations (a metabolite of nicotine) during pregnancy. The cut off point of 50 ng/ml was used to differentiate between non-smoking and active smoking [62].

<sup>c</sup>Maternal smoking during pregnancy for HOME estimated based on maternal serum cotinine concentrations during pregnancy. The cut off point of 3.0 ng/ml was used to differentiate non-smoking and active smoking [61].

<sup>d</sup>Note that for parity, the EARLI cohort consists of mothers who had at least one previous child.

<sup>e</sup>Pre-pregnancy BMI (kg/m<sup>2</sup>) was defined as normal/underweight <25, overweight ≥25-<30, and obese ≥ 30

**Table S2.** Study sample characteristics and median maternal urinary phthalate concentrations (ng/mL) according to covariates: the EARLI (2009–2012) and HOME Studies (2003–2006).

| Variable                               | Median (25 <sup>th</sup> & 75 <sup>th</sup> percentile) |               |                |              |              |             |
|----------------------------------------|---------------------------------------------------------|---------------|----------------|--------------|--------------|-------------|
|                                        | MCPP                                                    | MiBP          | MBzP           | MBP          | ΣDEHP        | MEP         |
| Overall                                | 2.1 (1.0, 5.6)                                          | 9.4 (4.7, 17) | 6.0 (3.0, 14)  | 13 (7.5, 25) | 35 (19, 70)  | 27 (14, 62) |
| Maternal Age                           |                                                         |               |                |              |              |             |
| <25 years                              | 1.2 (1.1, 2.4)                                          | 10 (7.0, 18)  | 6.4 (5.3, 9.0) | 11 (9.7, 12) | 21 (20, 182) | 16 (12, 18) |
| 25-<35 years                           | 2.2 (1.0, 6.0)                                          | 9.8 (4.7, 19) | 7.5 (3.6, 17)  | 15 (8.0, 33) | 43 (19, 74)  | 29 (15, 63) |
| 35+ years                              | 2.1 (1.1, 5.2)                                          | 9.2 (4.7, 15) | 5.0 (2.8, 9.9) | 12 (6.9, 20) | 31 (19, 58)  | 26 (12, 62) |
| Maternal Race                          |                                                         |               |                |              |              |             |
| White                                  | 2.7 (1.3, 7.1)                                          | 9.9 (4.5, 18) | 6.0 (3.0, 14)  | 14 (7.5, 28) | 36 (21, 70)  | 24 (13, 59) |
| Non-White                              | 1.6 (0.7, 3.5)                                          | 7.8 (4.9, 16) | 6.0 (2.9, 14)  | 12 (7.5, 20) | 33 (19, 70)  | 32 (17, 85) |
| Maternal Education                     |                                                         |               |                |              |              |             |
| High School or less                    | 1.9 (0.9, 5.9)                                          | 7.3 (4.4, 23) | 7.2 (3.6, 15)  | 14 (6.9, 23) | 37 (19, 69)  | 19 (13, 32) |
| Some College                           | 2.1 (1.2, 7.0)                                          | 9.7 (5.1, 17) | 7.4 (3.5, 18)  | 15 (7.7, 28) | 35 (21, 70)  | 35 (19, 76) |
| Completed College                      | 2.4 (1.0, 5.2)                                          | 9.2 (4.7, 15) | 5.1 (2.8, 12)  | 13 (7.5, 23) | 35 (19, 67)  | 25 (13, 60) |
| Annual Income                          |                                                         |               |                |              |              |             |
| <\$30,000                              | 1.9 (0.9, 5.7)                                          | 8.3 (3.4, 17) | 8.0 (3.5, 14)  | 15 (9.0, 20) | 47 (19, 81)  | 29 (15, 63) |
| \$30,000 - \$75,000                    | 2.2 (1.2, 5.6)                                          | 5.8 (13, 20)  | 8.8 (4.2, 18)  | 16 (8.4, 33) | 40 (23, 71)  | 43 (19, 86) |
| ≥\$75,000                              | 2.2 (1.0, 5.5)                                          | 9.0 (3.9, 15) | 4.7 (2.5, 10)  | 12 (7.2, 20) | 31 (19, 62)  | 23 (12, 47) |
| Maternal Smoking <sup>a,b</sup>        |                                                         |               |                |              |              |             |
| Non-Smoking                            | 2.1 (1.0, 5.5)                                          | 9.2 (4.7, 17) | 5.9 (2.9, 13)  | 13 (7.5, 23) | 35 (19, 69)  | 25 (14, 62) |
| Active Smoking                         | 3.1 (0.9, 6.4)                                          | 14 (6.4, 17)  | 13 (11, 19)    | 19 (12, 33)  | 34 (17, 70)  | 47 (14, 77) |
| Parity <sup>c</sup>                    |                                                         |               |                |              |              |             |
| 0                                      | --                                                      | --            | --             | --           | --           | --          |
| 1                                      | 2.7 (1.1, 7.2)                                          | 9.6 (5.0, 16) | 5.9 (2.5, 11)  | 14 (7.1, 23) | 34 (19, 69)  | 26 (13, 63) |
| 2 +                                    | 1.0 (1.0, 4.3)                                          | 9.0 (4.2, 17) | 6.2 (3.3, 17)  | 12 (7.8, 26) | 36 (21, 70)  | 27 (14, 62) |
| Pre-pregnancy BMI (kg/m <sup>2</sup> ) |                                                         |               |                |              |              |             |
| Normal/Underweight <25                 | 2.7 (1.3, 7.2)                                          | 8.7 (4.9, 16) | 5.5 (2.7, 12)  | 14 (7.4, 20) | 36 (19, 83)  | 29 (14, 69) |
| Overweight ≥25, <30                    | 1.8 (0.9, 6.1)                                          | 9.6 (4.5, 17) | 6.4 (3.2, 12)  | 11 (7.2, 27) | 36 (21, 67)  | 25 (14, 59) |
| Obese ≥30                              | 2.1 (0.9, 4.0)                                          | 9.9 (4.9, 17) | 7.2 (3.7, 17)  | 14 (7.9, 26) | 35 (19, 64)  | 25 (14, 47) |
| Child Sex                              |                                                         |               |                |              |              |             |
| Male                                   | 1.7 (0.9, 4.0)                                          | 8.8 (4.1, 16) | 5.9 (2.9, 12)  | 12 (7.3, 21) | 30 (19, 56)  | 24 (13, 62) |
| Female                                 | 2.9 (1.3, 7.1)                                          | 10 (5.13, 19) | 6.3 (3.1, 17)  | 15 (8.4, 29) | 46 (21, 73)  | 29 (15, 65) |

Table S1.b HOME

| Variable                               | Median (25 <sup>th</sup> & 75 <sup>th</sup> percentile) |                |                |               |               |                |
|----------------------------------------|---------------------------------------------------------|----------------|----------------|---------------|---------------|----------------|
|                                        | MCPD <sup>d</sup>                                       | MiBP           | MBzP           | MBP           | ΣDEHP         | MEP            |
| Overall                                | 2.2 (1.1, 4.4)                                          | 5.0 (1.6, 11)  | 9.4 (3.7, 23)  | 23 (10, 49)   | 77 (32, 175)  | 117 (44, 352)  |
| Maternal Age                           |                                                         |                |                |               |               |                |
| <25 years                              | 2.8 (1.4, 5.2)                                          | 8.5 (3.6, 15)  | 19 (8.2, 37)   | 41 (16, 69)   | 89 (41, 173)  | 164 (73, 401)  |
| 25-<35 years                           | 2.2 (1.0, 4.2)                                          | 4.1 (1.4, 9.4) | 7.6 (2.5, 19)  | 20 (9.1, 44)  | 80 (32, 187)  | 104 (38, 321)  |
| 35+ years                              | 1.8 (0.9, 3.0)                                          | 4.7 (1.5, 10)  | 9.1 (2.9, 17)  | 22 (9.4, 46)  | 51 (23, 130)  | 117 (31, 375)  |
| Maternal Race                          |                                                         |                |                |               |               |                |
| White                                  | 1.9 (0.9, 3.7)                                          | 3.0 (1.2, 8.3) | 6.3 (2.0, 15)  | 16 (7.7, 37)  | 62 (25, 155)  | 76 (27, 208)   |
| Non-White                              | 2.9 (1.5, 5.3)                                          | 9.3 (4.5, 16)  | 19.2 (9.1, 38) | 42 (21, 66)   | 102 (49, 203) | 232 (104, 662) |
| Maternal Education                     |                                                         |                |                |               |               |                |
| High School or less                    | 2.9 (1.5, 5.4)                                          | 9.2 (3.8, 17)  | 23 (9.9, 48)   | 42 (16, 74)   | 105 (49, 209) | 231 (90, 558)  |
| Some College                           | 2.9 (1.4, 5.2)                                          | 6.6 (2.4, 13)  | 13 (6.5, 26)   | 32 (16, 50)   | 81 (40, 176)  | 164 (59, 458)  |
| Completed College                      | 1.7 (0.9, 3.3)                                          | 2.8 (1.2, 7.3) | 12 (1.9, 11)   | 14 (7.1, 33)  | 57 (24, 149)  | 75 (25, 179)   |
| Annual Income                          |                                                         |                |                |               |               |                |
| <\$30,000                              | 3.0 (1.5, 5.7)                                          | 8.7 (3.8, 15)  | 21 (9.9, 46)   | 42 (18, 73)   | 96 (44, 189)  | 232 (88, 727)  |
| \$30,000 - \$75,000                    | 2.0 (1.1, 4.0)                                          | 4.2 (1.5, 11)  | 8.4 (3.1, 19)  | 22 (10, 44)   | 79 (32, 189)  | 93 (38, 335)   |
| ≥\$75,000                              | 1.8 (0.8, 3.3)                                          | 3.1 (1.2, 7.2) | 5.2 (1.7, 11)  | 15 (6.5, 35)  | 57 (24, 168)  | 84 (27, 207)   |
| Maternal Smoking <sup>a,b</sup>        |                                                         |                |                |               |               |                |
| Non-Smoking                            | 2.1 (1.0, 4.3)                                          | 4.5 (1.5, 11)  | 8.7 (3.2, 22)  | 23 (9.5, 48)  | 75 (32, 169)  | 110 (38, 318)  |
| Active Smoking                         | 3.1 (1.7, 5.3)                                          | 8.6 (3.9, 16)  | 15 (6.6, 37)   | 36 (16, 73)   | 106 (41, 207) | 267 (105, 596) |
| Parity <sup>c</sup>                    |                                                         |                |                |               |               |                |
| 0                                      | 1.7 (0.9, 4.0)                                          | 3.7 (1.3, 8.9) | 6.4 (1.9, 15)  | 18 (7.8, 43)  | 58 (22, 153)  | 93 (40, 278)   |
| 1                                      | 2.5 (1.3, 5.0)                                          | 6.7 (2.2, 13)  | 12 (4.7, 30)   | 26 (12, 57)   | 87 (40, 211)  | 114 (35, 324)  |
| 2 +                                    | 2.6 (1.1, 4.4)                                          | 7.0 (2.1, 15)  | 13 (5.3, 28)   | 32 (15.2, 57) | 83 (36, 183)  | 193 (79, 567)  |
| Pre-pregnancy BMI (kg/m <sup>2</sup> ) |                                                         |                |                |               |               |                |
| Normal/Underweight <25                 | 1.8 (0.8, 3.7)                                          | 3.5 (1.3, 9.0) | 6.7 (2.2, 17)  | 18 (7.9, 43)  | 61 (27, 156)  | 91 (33, 302)   |
| Overweight ≥25, <30                    | 2.5 (1.1, 4.5)                                          | 5.4 (2.0, 12)  | 9.5 (4.2, 22)  | 24 (11, 49)   | 71 (28, 171)  | 130 (51, 348)  |
| Obese ≥30                              | 2.9 (1.6, 5.3)                                          | 8.6 (3.8, 15)  | 16 (7.5, 36)   | 42 (16, 74)   | 122 (55, 232) | 161 (64, 504)  |
| Child Sex                              |                                                         |                |                |               |               |                |
| Male                                   | 2.1 (1.1, 4.3)                                          | 5.2 (1.6, 11)  | 8.8 (3.6, 20)  | 23 (10, 49)   | 77 (34, 160)  | 116 (37, 340)  |
| Female                                 | 2.2 (1.1, 4.6)                                          | 4.8 (1.7, 11)  | 9.9 (4.0, 25)  | 25 (10, 50)   | 76 (29, 184)  | 120 (49, 363)  |

BMI: body mass index, EARLI: Early Autism Risk Longitudinal Investigation Study, HOME: Health Outcomes and Measures of the Environment Study

<sup>a</sup> Maternal smoking during pregnancy for EARLI was based on maternal urinary cotinine concentrations (a metabolite of nicotine) during pregnancy. The cut off point of 50 ng/ml was used to differentiate between non-smoking and active smoking [62].

<sup>b</sup> Maternal smoking during pregnancy for HOME estimated based on maternal serum cotinine concentrations during pregnancy. The cut off point of 3.0 ng/ml was used to differentiate non-smoking and active smoking [61].

<sup>c</sup> Note that for parity, the EARLI cohort consists of mothers who had at least one previous child.

---

<sup>d</sup> Phthalate metabolites are ordered based on median concentration values from left (lowest median concentrations) the right (highest median concentrations).

**Table S3.** Univariate statistics of repeated maternal urinary concentrations of phthalate metabolites (ng/mL): the EARLI (2009–2012) and HOME Studies (2003–2006).

| Phthalate Metabolite <sup>a,b</sup> | N   | Percent>LOD | Minimum | Maximum  | 5 <sup>th</sup> Percentile | 25 <sup>th</sup> Percentile | Median | 75 <sup>th</sup> Percentile | 95 <sup>th</sup> Percentile |  |
|-------------------------------------|-----|-------------|---------|----------|----------------------------|-----------------------------|--------|-----------------------------|-----------------------------|--|
| <b>MCPP</b>                         |     |             |         |          |                            |                             |        |                             |                             |  |
| EARLI                               | 280 | 6.43        | 0.28    | 2390.00  | 0.28                       | 1.00                        | 2.10   | 5.63                        | 37.46                       |  |
| HOME                                | 552 | 4.76        | 0.14    | 66.7     | 0.30                       | 1.10                        | 3.36   | 4.40                        | 9.50                        |  |
| <b>MiBP</b>                         |     |             |         |          |                            |                             |        |                             |                             |  |
| EARLI                               | 280 | 1.07        | 0.57    | 527.00   | 1.50                       | 4.70                        | 9.35   | 16.83                       | 35.95                       |  |
| HOME                                | 552 | 16.85       | 0.21    | 84.10    | 0.34                       | 1.60                        | 5.00   | 11.00                       | 23.96                       |  |
| <b>MBzP</b>                         |     |             |         |          |                            |                             |        |                             |                             |  |
| EARLI                               | 280 | 1.43        | 0.21    | 312.00   | 0.89                       | 2.98                        | 6.00   | 13.63                       | 35.91                       |  |
| HOME                                | 552 | 3.00        | 0.16    | 820.80   | 0.75                       | 3.74                        | 9.36   | 23.40                       | 80.35                       |  |
| <b>MBP</b>                          |     |             |         |          |                            |                             |        |                             |                             |  |
| EARLI                               | 280 | 0.00        | 1.10    | 300.00   | 2.60                       | 7.50                        | 13.10  | 24.55                       | 64.89                       |  |
| HOME                                | 552 | 0.00        | 0.80    | 2240     | 3.04                       | 10.10                       | 23.40  | 49.20                       | 128.80                      |  |
| <b>ΣDEHP<sup>c</sup></b>            |     |             |         |          |                            |                             |        |                             |                             |  |
| EARLI                               | 280 | NA          | 1.77    | 2630.70  | 8.40                       | 19.42                       | 35.08  | 69.90                       | 184.73                      |  |
| HOME                                | 552 | NA          | 2.57    | 7211.43  | 9.57                       | 31.93                       | 77.07  | 175.387                     | 840.44                      |  |
| <b>MEP</b>                          |     |             |         |          |                            |                             |        |                             |                             |  |
| EARLI                               | 280 | 0.00        | 1.50    | 1330.00  | 4.39                       | 13.78                       | 26.95  | 62.35                       | 213.30                      |  |
| HOME                                | 552 | 0.00        | 2.57    | 26004.00 | 11.56                      | 43.69                       | 117.48 | 351.78                      | 1717.32                     |  |

EARLI: Early Autism Risk Longitudinal Investigation Study, HOME: Health Outcomes and Measures of the Environment Study

<sup>a</sup> MCPP, mono(3-carboxypropyl) phthalate; MiBP, mono-isobutyl phthalate; MBzP, monobenzyl phthalate; MBP, mono-n-butyl phthalate; ΣDEHP, summary di(2-ethylhexyl) phthalate metabolite measure; MEP, monoethyl phthalate

<sup>b</sup> Phthalate metabolites are ordered based on median concentration values from left (lowest median concentrations) the right (highest median concentrations).

<sup>c</sup> Concentrations of ΣDEHP (in ng/mL) were calculated using the following formula: ΣDEHP (ng/mL) = [MECPP (ng/mL) /278 g/mol + MEHHP (ng/mL) /294.3 g/mol + MEOHP (ng/mL) /292.2 g/mol + MEHP (ng/mL) /278.3 g/mol] \*278 g/mol.

**Table S4.** Pearson correlation coefficients between log-10 transformed gestational urinary phthalate metabolites (ng/mL)<sup>a,b</sup>: the EARLI (2009–2012) and HOME Studies (2003–2006).

|       | MBP   | MBzP | MEP  | MiBP | MCPP  | ΣDEHP <sup>c</sup> |
|-------|-------|------|------|------|-------|--------------------|
| MBP   | 1.0   | 0.56 | 0.33 | 0.65 | 0.16  | 0.30               |
| MBzP  | 0.44  | 1.0  | 0.16 | 0.40 | 0.00  | 0.18               |
| MEP   | 0.15  | 0.12 | 1.0  | 0.21 | -0.05 | 0.19               |
| MiBP  | 0.48  | 0.36 | 0.27 | 1.0  | 0.15  | 0.24               |
| MCPP  | 0.38  | 0.21 | 0.04 | 0.18 | 1.0   | 0.36               |
| ΣDEHP | 0.16  | 0.09 | 0.05 | 0.11 | 0.41  | 1.0                |
| KEY   | EARLI |      |      | HOME |       |                    |

EARLI: Early Autism Risk Longitudinal Investigation Study, HOME: Health Outcomes and Measures of the Environment Study

<sup>a</sup> MCPP, mono(3-carboxypropyl) phthalate; MiBP, mono-isobutyl phthalate; MBzP, monobenzyl phthalate; MBP, mono-n-butyl phthalate; ΣDEHP, summary di(2-ethylhexyl) phthalate metabolite measure; MEP, monoethyl phthalate

<sup>b</sup> Phthalate metabolites are ordered based on median concentration values from left (lowest median concentrations) the right (highest median concentrations).

<sup>c</sup> Concentrations of ΣDEHP (in ng/mL) were calculated using the following formula: ΣDEHP (ng/mL) = [MECPP (ng/mL) /278 g/mol + MEHHP (ng/mL) /294.3 g/mol + MEOHP (ng/mL) /292.2 g/mol + MEHP (ng/mL) /278.3 g/mol] \*278 g/mol.

**Table S5.** Intra-class correlation coefficients and (95% confidence intervals (CI)) for gestational urinary phthalate metabolites (ng/mL)<sup>a,b</sup>: the EARLI (2009–2012) and HOME Studies (2003–2006).

| Time Period Collected | EARLI                                                            | HOME                      |
|-----------------------|------------------------------------------------------------------|---------------------------|
|                       | 1 <sup>st</sup> and 2 <sup>nd</sup> or 3 <sup>rd</sup> trimester | 16 and 26 weeks gestation |
| Phthalate metabolite  | ICC (95% CI)                                                     | ICC (95% CI)              |
| MCP                   | 0.27 (0.11, 0.42)                                                | 0.29 (0.18, 0.39)         |
| MiBP                  | 0.54 (0.41, 0.65)                                                | 0.40 (0.30, 0.50)         |
| MBzP                  | 0.55 (0.42, 0.65)                                                | 0.49 (0.39, 0.57)         |
| MBP                   | 0.49 (0.35, 0.60)                                                | 0.25 (0.13, 0.36)         |
| ΣDEHP <sup>c</sup>    | 0.03 (-0.13, 0.20)                                               | 0.16 (0.04, 0.27)         |
| MEP                   | 0.63 (0.52, 0.72)                                                | 0.42 (0.31, 0.51)         |

EARLI: Early Autism Risk Longitudinal Investigation Study, HOME: Health Outcomes and Measures of the Environment Study

<sup>a</sup> MCP, mono(3-carboxypropyl) phthalate; MiBP, mono-isobutyl phthalate; MBzP, monobenzyl phthalate; MBP, mono-n-butyl phthalate; ΣDEHP, summary di(2-ethylhexyl) phthalate metabolite measure; MEP, monoethyl phthalate

<sup>b</sup> Phthalate metabolites are ordered based on median concentration values from left (lowest median concentrations) the right (highest median concentrations).

<sup>c</sup> Concentrations of ΣDEHP (in ng/mL) were calculated using the following formula: ΣDEHP (ng/mL) = [MECPP (ng/mL) /278 g/mol + MEHHP (ng/mL) /294.3 g/mol + MEOHP (ng/mL) /292.2 g/mol + MEHP (ng/mL) /278.3 g/mol] \*278 g/mol.





**Table S6:** Unadjusted and adjusted<sup>b</sup> differences (95% Confidence Intervals (CI)) in Child SRS T-scores at 3 to 8 years per 10-fold increase in gestational urinary phthalate metabolite concentrations at quantiles of SRS T-scores<sup>c</sup>: the EARLI (2009–2012) and HOME Studies (2003–2006).

| Phthalate Metabolite | Tau  | EARLI (n=140)  |               |              | HOME (n=276) |             |             | POOLED      |             |
|----------------------|------|----------------|---------------|--------------|--------------|-------------|-------------|-------------|-------------|
|                      |      | n <sup>d</sup> | Crude         | Adjusted     | n            | Crude       | Adjusted    | Crude       | Adjusted    |
| MCPP                 | 0.05 | 9              | 2 (-2, 2)     | 0 (-4, 2)    | 26           | 0 (-4, 0)   | -1 (-6, 4)  | 0 (-3, 2)   | 1 (-3, 1)   |
|                      | 0.10 | 21             | 0 (0, 2)      | 0 (-1, 2)    | 35           | 2 (-3, 3)   | 0 (-4, 4)   | 0 (-1, 0)   | 1 (0, 1)    |
|                      | 0.25 | 41             | 0 (-4, 1)     | -1 (-4, 1)   | 72           | 0 (-5, 4)   | 3 (-1, 7)   | -2 (-4, -1) | 1 (-2, 2)   |
|                      | 0.50 | 80             | -3 (-4, -1)   | -1 (-6, 0)   | 148          | 0 (-6, 4)   | 4 (-3, 7)   | -4 (-6, -1) | 0 (-2, 3)   |
|                      | 0.75 | 107            | -4 (-6, 3)    | -3 (-4, 2)   | 213          | -1 (-7, 5)  | 4 (-1, 7)   | -3 (-8, 3)  | 0 (-3, 2)   |
|                      | 0.90 | 127            | -2 (-11, 5)   | -2 (-10, 3)  | 249          | -7 (-10, 5) | 0 (-1, 15)  | -4 (-10, 3) | 0 (-4, 5)   |
|                      | 0.95 | 133            | -9 (-14, 18)  | -2 (-7, 17)  | 263          | 3 (-10, 17) | 5 (-3, 15)  | -3 (-8, 17) | -3 (-5, 2)  |
| MiBP                 | 0.05 | 9              | -2 (-5, 6)    | -2 (-9, 5)   | 26           | 0 (-2, 0)   | 1 (-1, 4)   | -2 (-3, 0)  | -1 (-2, 2)  |
|                      | 0.10 | 21             | 0 (-4, 1)     | -1 (-7, 3)   | 35           | 0 (-2, 2)   | 1 (0, 3)    | -2 (-3, 2)  | 0 (-1, 2)   |
|                      | 0.25 | 41             | 0 (-5, 6)     | 0 (-4, 6)    | 72           | 1 (-3, 3)   | 2 (0, 4)    | -2 (-3, 1)  | 2 (-1, 3)   |
|                      | 0.50 | 80             | -1 (-7, 3)    | -1 (-6, 2)   | 148          | 4 (-1, 7)   | 2 (-1, 4)   | -3 (-5, 1)  | 2 (-1, 3)   |
|                      | 0.75 | 107            | -3 (-10, 3)   | -7 (-11, 0)  | 213          | 4 (-1, 10)  | -1 (-4, 4)  | 0 (-5, 4)   | 0 (-4, 3)   |
|                      | 0.90 | 127            | -8 (-12, 7)   | -4 (-10, 4)  | 249          | 12 (-1, 25) | 1 (-4, 15)  | 3 (-8, 8)   | 0 (-4, 8)   |
|                      | 0.95 | 133            | -2 (-15, 9)   | -4 (-7, 5)   | 263          | 25 (4, 34)  | 14 (2, 23)  | 6 (-2, 23)  | 11 (1, 13)  |
| MBzP                 | 0.05 | 9              | 0 (-3, 2)     | -1 (-2, 1)   | 26           | 0 (0, 0)    | 1 (-1, 3)   | 0 (0, 1)    | 0 (-2, 1)   |
|                      | 0.10 | 21             | 0 (-3, 0)     | -1 (-2, 1)   | 35           | 1 (-3, 2)   | 1 (-1, 2)   | 0 (0, 1)    | 0 (-1, 1)   |
|                      | 0.25 | 41             | -2 (-5, 3)    | -2 (-5, 1)   | 72           | 4 (0, 6)    | 0 (-1, 3)   | 2 (-1, 4)   | 0 (-1, 2)   |
|                      | 0.50 | 80             | -2 (-5, 4)    | -1 (-5, 1)   | 148          | 5 (3, 9)    | 1 (-3, 4)   | 5 (4, 7)    | 1 (-2, 3)   |
|                      | 0.75 | 107            | 2 (-4, 7)     | -1 (-4, 4)   | 213          | 6 (3, 8)    | 1 (-2, 5)   | 7 (3, 9)    | 1 (0, 6)    |
|                      | 0.90 | 127            | 9 (7, 19)     | 1 (-10, 10)  | 249          | 8 (2, 17)   | 5 (-2, 10)  | 10 (4, 16)  | 6 (1, 10)   |
|                      | 0.95 | 133            | 11 (4, 15)    | 3 (-9, 8)    | 263          | 20 (-2, 21) | 10 (2, 14)  | 16 (1, 20)  | 10 (6, 11)  |
| MBP                  | 0.05 | 9              | -4 (-5, 2)    | -2 (-7, -1)  | 26           | 0 (-6, 0)   | 0 (-5, 4)   | 0 (-3, 0)   | -2 (-5, 2)  |
|                      | 0.10 | 21             | -2 (-8, 2)    | -1 (-8, 1)   | 35           | 0 (-2, 2)   | 0 (-3, 3)   | 0 (-1, 0)   | 0 (-2, 1)   |
|                      | 0.25 | 41             | -4 (-7, 1)    | -3 (-7, 0)   | 72           | 1 (-1, 4)   | 0 (-1, 3)   | 0 (-2, 2)   | 0 (-2, 1)   |
|                      | 0.50 | 80             | -4 (-9, -1)   | -5 (-9, -1)  | 148          | 3 (-2, 7)   | 2 (-3, 3)   | 5 (2, 6)    | -1 (-3, 2)  |
|                      | 0.75 | 107            | 3 (-13, 11)   | -7 (-11, 5)  | 213          | 0 (-3, 6)   | -2 (-5, 8)  | 3 (-2, 9)   | -1 (-6, 5)  |
|                      | 0.90 | 127            | 0 (-14, 13)   | -7 (-18, 4)  | 249          | 4 (-10, 13) | -1 (-4, 10) | 5 (-7, 11)  | -1 (-8, 3)  |
|                      | 0.95 | 133            | -3 (-27, 25)  | -12 (-15, 6) | 263          | 2 (-11, 30) | 14 (1, 16)  | 0 (-8, 25)  | 10 (-5, 14) |
| ΣDEHP <sup>a</sup>   | 0.05 | 9              | 0 (-7, 4)     | 1 (-5, 4)    | 26           | 0 (0, 2)    | 2 (-1, 3)   | 1 (-2, 3)   | 2 (0, 3)    |
|                      | 0.10 | 21             | 0 (-3, 3)     | 0 (-4, 4)    | 35           | 2 (-1, 2)   | 2 (0, 3)    | 2 (-1, 3)   | 2 (0, 3)    |
|                      | 0.25 | 41             | 0 (-8, 3)     | -2 (-9, 1)   | 72           | 1 (-2, 3)   | 1 (0, 5)    | 3 (0, 4)    | 1 (0, 3)    |
|                      | 0.50 | 80             | -4 (-7, -1)   | -5 (-7, -1)  | 148          | 2 (-2, 6)   | 5 (2, 7)    | 4 (0, 6)    | 2 (0, 4)    |
|                      | 0.75 | 107            | -7 (-12, -1)  | -6 (-11, -2) | 213          | 0 (-5, 5)   | 4 (-1, 7)   | 1 (-9, 5)   | -1 (-4, 4)  |
|                      | 0.90 | 127            | -19 (-27, -4) | -16 (-18, 7) | 249          | -5 (-9, 6)  | 5 (0, 11)   | -7 (-10, 3) | 2 (-3, 9)   |
|                      | 0.95 | 133            | -15 (-34, -7) | -15 (-23, 9) | 263          | 4 (-7, 14)  | 9 (-1, 17)  | -5 (-8, 19) | 8 (3, 13)   |
| MEP                  | 0.05 | 9              | 0 (-2, 0)     | 0 (-2, 0)    | 26           | -2 (-3, 1)  | -1 (-4, 1)  | 0 (-1, 0)   | -1 (-2, 0)  |
|                      | 0.10 | 21             | 0 (-1, 0)     | -1 (-2, 0)   | 35           | -1 (-2, 1)  | -1 (-3, 1)  | 0 (0, 1)    | -1 (-1, 0)  |
|                      | 0.25 | 41             | -2 (-2, 3)    | -1 (-3, 0)   | 72           | 1 (-2, 3)   | 0 (-2, 2)   | 2 (-1, 3)   | -1 (-2, 1)  |
|                      | 0.50 | 80             | -2 (-6, 2)    | -3 (-5, 1)   | 148          | 1 (-1, 3)   | 1 (-2, 3)   | 3 (1, 5)    | 0 (-2, 2)   |
|                      | 0.75 | 107            | -3 (-8, 4)    | -5 (-10, 2)  | 213          | 3 (-4, 7)   | 1 (-2, 3)   | 5 (1, 7)    | 0 (-4, 2)   |
|                      | 0.90 | 127            | -12 (-14, 10) | -12 (-15, 6) | 249          | 6 (-1, 12)  | 2 (-4, 9)   | 4 (-1, 8)   | 1 (-5, 7)   |
|                      | 0.95 | 133            | -3 (-20, 23)  | 1 (-2, 16)   | 263          | 8 (2, 18)   | 3 (-6, 19)  | 6 (-2, 9)   | 1 (-6, 14)  |

---

EARLI: Early Autism Risk Longitudinal Investigation Study, HOME: Health Outcomes and Measures of the Environment Study, SRS: Social Responsiveness Scale

MCPP, mono(3-carboxypropyl) phthalate; MiBP, mono-isobutyl phthalate; MBzP, monobenzyl phthalate; MBP, mono-n-butyl phthalate;  $\Sigma$ DEHP, summary di(2-ethylhexyl) phthalate metabolite measure; MEP, monoethyl phthalate

Phthalate metabolites are ordered based on median concentration values from left (lowest median concentrations) the right (highest median concentrations).

<sup>a</sup> Concentrations of  $\Sigma$ DEHP (in ng/mL) were calculated using the following formula:  $\Sigma$ DEHP (ng/mL) = [MECPP (ng/mL) / 278 g/mol + MEHHP (ng/mL) / 294.3 g/mol + MEOHP (ng/mL) / 292.2 g/mol + MEHP (ng/mL) / 278.3 g/mol] \* 278 g/mol.

<sup>b</sup> Adjusted for maternal age (continuous), maternal race (white vs non-white), income (<\$30,000 vs \$30,000–\$75,000,  $\geq$  \$75,000), parity (continuous), and  $\log_{10}$ –transformed urine/serum cotinine concentrations (continuous). Note cotinine concentrations were ascertained from maternal urine in EARLI and serum in HOME. In the pooled cohort model, adjusted for smoking during pregnancy as a binary variable. The pooled results are adjusted for cohort.

<sup>c</sup> Positive coefficients for SRS indicate that maternal phthalate exposure is associated with more deficits in social responsiveness traits

<sup>d</sup> Number of participants at each percentile of SRS scores

**Table S7:** Unadjusted and adjusted differences in children’s SRS T-scores at ages 3 to 8 per 10-fold increase in gestational urinary phthalate metabolite concentrations using linear regression: the EARLI (2009–2012) and HOME Studies (2003–2006).

| Phthalate Metabolite <sup>c</sup> | Linear regression Results: $\beta$ (95% CI) |             |               |             |                 |              |             |
|-----------------------------------|---------------------------------------------|-------------|---------------|-------------|-----------------|--------------|-------------|
|                                   | Full Sample                                 |             | Male Children |             | Female Children |              |             |
|                                   | Crude                                       | Adjusted    | Crude         | Adjusted    | Crude           | Adjusted     |             |
| MCPP                              | EARLI                                       | -3 (-7, 1)  | -3 (-7, 1)    | -2 (-8, 4)  | -3 (-9, 3)      | -3 (-7, 0)   | -3 (-7, 0)  |
|                                   | HOME                                        | 0 (-5, 5)   | 3 (-1, 8)     | 4 (-3, 10)  | 4 (-2, 10)      | -4 (-11, 3)  | 1 (-6, 8)   |
|                                   | POOLED                                      | -3 (-6, 0)  | 0 (-3, 3)     | 0 (-5, 4)   | 0 (-4, 5)       | -5 (-10, -1) | -1 (-5, 3)  |
| MiBP                              | EARLI                                       | -2 (-9, 4)  | -2 (-8, 4)    | -3 (-13, 7) | -2 (-11, 7)     | -2 (-8, 5)   | -1 (-7, 5)  |
|                                   | HOME                                        | 3 (0, 8)    | 3 (-1, 6)     | 5 (0, 10)   | 3 (-2, 8)       | 4 (-2, 10)   | 1 (-4, 7)   |
|                                   | POOLED                                      | -1 (-4, 2)  | 1 (-2, 5)     | 1 (-3, 6)   | 1 (-3, 6)       | -3 (-7, 1)   | 1 (-3, 5)   |
| MBzP                              | EARLI                                       | 3 (-2, 8)   | 1 (-4, 6)     | 5 (-3, 14)  | 2 (-6, 10)      | 1 (-4, 6)    | 0 (-5, 5)   |
|                                   | HOME                                        | 5 (2, 8)    | 1 (-2, 5)     | 4 (0, 9)    | 1 (-3, 5)       | 5 (1, 10)    | 1 (-4, 6)   |
|                                   | POOLED                                      | 5 (3, 8)    | 2 (-1, 4)     | 5 (1, 9)    | 2 (-2, 6)       | 6 (2, 9)     | 1 (-2, 5)   |
| MBP                               | EARLI                                       | -2 (-9, 4)  | -4 (-10, 3)   | -3 (-13, 8) | -5 (-14, 5)     | -1 (-8, 6)   | -2 (-9, 4)  |
|                                   | HOME                                        | 2 (-3, 7)   | 1 (-4, 5)     | 4 (-3, 10)  | 1 (-5, 7)       | 0 (-6, 7)    | -2 (-8, 4)  |
|                                   | POOLED                                      | 3 (-1, 6)   | 0 (-4, 3)     | 1 (-4, 7)   | -1 (-6, 4)      | 4 (-1, 9)    | -1 (-6, 4)  |
| ΣDEHP                             | EARLI                                       | -7 (-14, 0) | -7 (-14, -1)  | -7 (-18, 3) | -7 (-17, 2)     | -5 (-11, 2)  | -6 (-13, 0) |
|                                   | HOME                                        | 1 (-2, 4)   | 4 (1, 7)      | 1 (-4, 5)   | 3 (-1, 7)       | 1 (-4, 6)    | 4 (-1, 8)   |
|                                   | POOLED                                      | 1 (-1, 4)   | 1 (-2, 4)     | -1 (-5, 3)  | 1 (-3, 5)       | 3 (-1, 7)    | 2 (-2, 6)   |
| MEP                               | EARLI                                       | -2 (-6, 2)  | -3 (-7, 1)    | -2 (-9, 5)  | -3 (-9, 3)      | -2 (-6, 3)   | -3 (-8, 1)  |
|                                   | HOME                                        | 2 (0, 5)    | 1 (-2, 3)     | 2 (-2, 5)   | 1 (-3, 4)       | 4 (1, 6)     | 1 (-3, 5)   |
|                                   | POOLED                                      | 3 (1, 4)    | 0 (-2, 2)     | 1 (-2, 3)   | -1 (-4, 2)      | 5 (2, 7)     | 0 (-3, 3)   |

EARLI: Early Autism Risk Longitudinal Investigation Study, HOME: Health Outcomes and Measures of the Environment Study, SRS: Social Responsiveness Scale

<sup>a</sup> Adjusted for maternal age (continuous), maternal race (white vs non-white), income (<\$30,000 vs \$30,000–\$75,000, ≥ \$75,000), parity (continuous), and log<sub>10</sub>-transformed urine/serum cotinine concentrations (continuous). Note cotinine concentrations were ascertained from maternal urine in EARLI and serum in HOME. In the pooled cohort model, adjusted for smoking during pregnancy as a binary variable. The pooled results are adjusted for cohort.

<sup>b</sup> Positive coefficients for SRS indicate that maternal phthalate exposure is associated with more deficits in social responsiveness traits.

<sup>c</sup> Phthalate metabolites are ordered based on median concentration values from left (lowest median concentrations) the right (highest median concentrations).



**Table S8.** Unadjusted and adjusted differences in children’s SRS T-scores at ages 3 to 8 per 10-fold increase in gestational urinary phthalate metabolite concentrations using quantile regression, stratified by child sex: the EARLI (2009–2012) and HOME Studies (2003–2006).

| Phthalate Metabolite | Tau  | Quantile Regression Results: $\beta$ (95% CI) |                 |               |                 |
|----------------------|------|-----------------------------------------------|-----------------|---------------|-----------------|
|                      |      | EARLI                                         |                 | HOME          |                 |
|                      |      | Male Children                                 | Female Children | Male Children | Female Children |
| MCP                  | 0.05 | 2 (-13, 9)                                    | -1 (-11, 14)    | -3 (-10, 11)  | 6 (-7, 15)      |
|                      | 0.10 | 2 (1, 7)                                      | -1 (-5, 1)      | -3 (-11, 4)   | 2 (-9, 12)      |
|                      | 0.25 | 2 (-4, 6)                                     | -1 (-6, 0)      | 1 (-5, 8)     | 2 (-4, 8)       |
|                      | 0.50 | -1 (-12, 2)                                   | -2 (-5, -1)     | 7 (-5, 12)    | 2 (-5, 7)       |
|                      | 0.75 | -2 (-6, 3)                                    | -3 (-7, -3)     | 3 (-3, 14)    | 0 (-11, 8)      |
|                      | 0.90 | 0 (-8, 11)                                    | -2 (-6, 11)     | 9 (0, 19)     | -4 (-12, 6)     |
|                      | 0.95 | -2 (-11, 27)                                  | -8 (-14, 19)    | 17 (-2, 24)   | -3 (-12, 0)     |
|                      | MiBP | 0.05                                          | 2 (-17, 8)      | 0 (-8, 12)    | 2 (-2, 10)      |
| 0.10                 |      | 1 (-7, 15)                                    | 2 (-8, 11)      | 3 (-2, 7)     | 1 (-4, 7)       |
| 0.25                 |      | 2 (-4, 12)                                    | 2 (-5, 8)       | 2 (-2, 6)     | 1 (-1, 3)       |
| 0.50                 |      | -3 (-10, 9)                                   | 1 (-7, 6)       | 2 (-5, 6)     | 1 (-3, 4)       |
| 0.75                 |      | -10 (-14, 1)                                  | 1 (-9, 2)       | -2 (-5, 6)    | 0 (-9, 6)       |
| 0.90                 |      | -5 (-13, 1)                                   | -2 (-6, 11)     | 1 (-1, 14)    | 4 (-11, 21)     |
| 0.95                 |      | -5 (-7, 4)                                    | -11 (-11, 32)   | 10 (-15, 26)  | 8 (-18, 25)     |
| MBzP                 |      | 0.05                                          | 0 (-13, 2)      | 0 (-6, 6)     | 2 (1, 2)        |
|                      | 0.10 | -2 (-3, 4)                                    | 1 (-4, 3)       | 2 (0, 4)      | -1 (-7, 4)      |
|                      | 0.25 | 0 (-5, 5)                                     | 0 (-5, 2)       | 0 (-1, 4)     | -1 (-6, 3)      |
|                      | 0.50 | 0 (-8, 6)                                     | -1 (-5, 3)      | -2 (-5, 4)    | 1 (-5, 5)       |
|                      | 0.75 | 3 (-9, 9)                                     | 0 (-5, 4)       | -3 (-7, 6)    | 3 (-1, 7)       |
|                      | 0.90 | 1 (-9, 6)                                     | 2 (-6, 8)       | 2 (-9, 10)    | 5 (-2, 8)       |
|                      | 0.95 | 5 (-1, 8)                                     | 4 (-15, 17)     | 14 (-20, 17)  | 4 (-2, 14)      |
|                      | MBP  | 0.05                                          | -2 (-9, 3)      | -1 (-11, 2)   | 0 (-6, 6)       |
| 0.10                 |      | -2 (-8, 2)                                    | -1 (-8, 1)      | 0 (-4, 3)     | 1 (-6, 4)       |
| 0.25                 |      | -3 (-8, 2)                                    | -3 (-5, 1)      | 0 (-3, 3)     | 1 (-2, 3)       |
| 0.50                 |      | -8 (-17, 4)                                   | -4 (-7, 2)      | 2 (-5, 7)     | -1 (-5, 3)      |
| 0.75                 |      | -13 (-23, 1)                                  | -6 (-10, 3)     | -1 (-6, 9)    | -4 (-10, 4)     |
| 0.90                 |      | -11 (-28, -1)                                 | -3 (-5, 14)     | 2 (-1, 6)     | 1 (-12, 16)     |
| 0.95                 |      | -12 (-28, 8)                                  | 8 (-10, 32)     | 11 (-17, 14)  | 4 (-11, 15)     |
| $\Sigma$ DEHP        |      | 0.05                                          | 3 (-13, 4)      | -1 (-24, 2)   | 2 (-3, 4)       |
|                      | 0.10 | 3 (-8, 4)                                     | -1 (-14, 2)     | 2 (-1, 4)     | 4 (-1, 7)       |
|                      | 0.25 | 1 (-8, 6)                                     | -3 (-11, 0)     | 1 (-1, 5)     | 4 (0, 5)        |
|                      | 0.50 | -7 (-10, 3)                                   | -5 (-9, -1)     | 4 (-1, 9)     | 3 (0, 6)        |
|                      | 0.75 | -7 (-16, 0)                                   | -6 (-13, -2)    | 2 (-3, 10)    | 4 (-2, 13)      |
|                      | 0.90 | -5 (-21, 8)                                   | -6 (-14, 6)     | 2 (-1, 12)    | 7 (-6, 11)      |
|                      | 0.95 | -9 (-15, 10)                                  | -11 (-27, 17)   | 8 (-7, 21)    | 0 (-4, 22)      |
|                      | MEP  | 0.05                                          | 0 (-1, 1)       | 0 (-1, 1)     | 0 (-7, 5)       |
| 0.10                 |      | 0 (-4, 1)                                     | 1 (-1, 2)       | 1 (-4, 4)     | -2 (-4, 2)      |
| 0.25                 |      | -2 (-5, 0)                                    | 1 (0, 2)        | 0 (-2, 3)     | -2 (-3, 1)      |
| 0.50                 |      | -6 (-8, 2)                                    | 0 (-4, 3)       | 1 (-3, 4)     | 1 (-1, 4)       |
| 0.75                 |      | -9 (-15, 8)                                   | -6 (-8, 4)      | 2 (-3, 4)     | 0 (-5, 6)       |
| 0.90                 |      | 0 (-16, 15)                                   | -11 (-14, 5)    | 1 (-1, 7)     | 3 (-6, 12)      |
| 0.95                 |      | 4 (-19, 18)                                   | -11 (-20, 11)   | 10 (-4, 19)   | -1 (-4, 18)     |

---

EARLI: Early Autism Risk Longitudinal Investigation Study, HOME: Health Outcomes and Measures of the Environment Study, SRS: Social Responsiveness Scale

MCPP, mono(3-carboxypropyl) phthalate; MiBP, mono-isobutyl phthalate; MBzP, monobenzyl phthalate; MBP, mono-n-butyl phthalate;  $\Sigma$ DEHP, summary di(2-ethylhexyl) phthalate metabolite measure; MEP, monoethyl phthalate. Phthalate metabolites are ordered based on median concentration values from left (lowest median concentrations) the right (highest median concentrations).

<sup>a</sup> Concentrations of  $\Sigma$ DEHP (in ng/mL) were calculated using the following formula:  $\Sigma$ DEHP (ng/mL) = [MECPP (ng/mL) / 278 g/mol + MEHHP (ng/mL) / 294.3 g/mol + MEOHP (ng/mL) / 292.2 g/mol + MEHP (ng/mL) / 278.3 g/mol] \* 278 g/mol.

<sup>b</sup> Adjusted for maternal age (continuous), maternal race (white vs non-white), income (<\$30,000 vs \$30,000–\$75,000,  $\geq$  \$75,000), parity (continuous), and  $\log_{10}$ -transformed urine/serum cotinine concentrations (continuous). Note cotinine concentrations were ascertained from maternal urine in EARLI and serum in HOME. In the pooled cohort model, adjusted for smoking during pregnancy as a binary variable. The pooled results are adjusted for cohort.

<sup>c</sup> Positive coefficients for SRS indicate that maternal phthalate exposure is associated with more deficits in social responsiveness traits.





**Table S9:** Unadjusted and adjusted <sup>b,c</sup> differences (95% confidence intervals (CI)) in child SRS raw scores at 3 to 8 years per 10-fold increase in gestational urinary phthalate metabolite concentrations at quantiles of SRS T-scores: <sup>d</sup> the EARLI (2009–2012) and HOME Studies (2003–2006).

| Phthalate Metabolite | Tau               | EARLI        |                | HOME         |                |
|----------------------|-------------------|--------------|----------------|--------------|----------------|
|                      |                   | SRS T-scores | SRS raw scores | SRS T-scores | SRS raw scores |
| MCPP                 | 0.05              | 0 (-4, 2)    | -1 (-9, 7)     | -1 (-6, 4)   | -1 (-6, 8)     |
|                      | 0.10              | 0 (-1, 2)    | 1 (-3, 4)      | 0 (-4, 4)    | 3 (-4, 8)      |
|                      | 0.25              | -1 (-4, 1)   | -3 (-10, 4)    | 3 (-1, 7)    | 1 (-2, 12)     |
|                      | 0.50              | -1 (-6, 0)   | -10 (-15, 0)   | 4 (-3, 7)    | 7 (-6, 14)     |
|                      | 0.75              | -3 (-4, 2)   | -10 (-15, 2)   | 4 (-1, 7)    | 10 (1, 11)     |
|                      | 0.90              | -2 (-10, 3)  | -9 (-10, 29)   | 0 (-1, 15)   | 8 (-3, 20)     |
|                      | 0.95              | -2 (-7, 17)  | -11 (-15, 43)  | 5 (-3, 15)   | 11 (-2, 31)    |
|                      | Mean <sup>c</sup> | -3 (-7, 1)   | -7 (-18, 3)    | 3 (-1, 8)    | 7 (-2, 16)     |
| MiBP                 | 0.05              | -2 (-9, 5)   | -9 (-26, 17)   | 1 (-1, 4)    | 3 (-2, 6)      |
|                      | 0.10              | -1 (-7, 3)   | -4 (-19, 8)    | 1 (0, 3)     | 4 (-1, 7)      |
|                      | 0.25              | 0 (-4, 6)    | 3 (-15, 16)    | 2 (0, 4)     | 2 (1, 8)       |
|                      | 0.50              | -1 (-6, 2)   | -4 (-19, 7)    | 2 (-1, 4)    | 4 (-3, 9)      |
|                      | 0.75              | -7 (-11, 0)  | -18 (-30, 3)   | -1 (-4, 4)   | -1 (-9, 7)     |
|                      | 0.90              | -4 (-10, 4)  | -1 (-22, 9)    | 1 (-4, 15)   | 6 (-3, 19)     |
|                      | 0.95              | -4 (-7, 5)   | -7 (-11, 15)   | 14 (2, 23)   | 20 (4, 46)     |
|                      | mean              | -2 (-8, 4)   | -6 (-21, 9)    | 3 (-1, 6)    | 6 (-1, 14)     |
| MBzP                 | 0.05              | -1 (-2, 1)   | -3 (-8, 2)     | 1 (-1, 3)    | 1 (-1, 5)      |
|                      | 0.10              | -1 (-2, 1)   | -2 (-3, 0)     | 1 (-1, 2)    | 2 (-3, 4)      |
|                      | 0.25              | -2 (-5, 1)   | -5 (-11, 4)    | 0 (-1, 3)    | 0 (-2, 7)      |
|                      | 0.50              | -1 (-5, 1)   | -3 (-14, 5)    | 1 (-3, 4)    | 3 (-3, 7)      |
|                      | 0.75              | -1 (-4, 4)   | -6 (-15, 8)    | 1 (-2, 5)    | 0 (-5, 6)      |
|                      | 0.90              | 1 (-10, 10)  | -3 (-12, 10)   | 5 (-2, 10)   | 6 (-4, 16)     |
|                      | 0.95              | 3 (-9, 8)    | 1 (-10, 17)    | 10 (2, 14)   | 13 (-2, 19)    |
|                      | mean              | 1 (-4, 6)    | 2 (-11, 14)    | 1 (-4, 5)    | 3 (-3, 9)      |
| MBP                  | 0.05              | -2 (-7, -1)  | -7 (-13, -1)   | 0 (-5, 4)    | 2 (-3, 5)      |
|                      | 0.10              | -1 (-8, 1)   | -3 (-15, 0)    | 0 (-3, 3)    | 3 (-6, 6)      |
|                      | 0.25              | -3 (-7, 0)   | -7 (-18, -3)   | 0 (-1, 3)    | 0 (-3, 3)      |
|                      | 0.50              | -5 (-9, -1)  | -7 (-22, 4)    | 2 (-3, 3)    | 3 (-5, 7)      |
|                      | 0.75              | -7 (-11, 5)  | -20 (-35, -7)  | -2 (-5, 8)   | -6 (-12, 5)    |
|                      | 0.90              | -7 (-18, 4)  | -14 (-27, 8)   | -1 (-4, 10)  | -1 (-12, 14)   |
|                      | 0.95              | -12 (-15, 6) | -11 (-28, 23)  | 14 (1, 16)   | 3 (-10, 26)    |
|                      | mean              | -4 (-10, 3)  | -9 (-24, 7)    | 1 (-4, 5)    | 1 (-7, 9)      |
| ΣDEHP <sup>a</sup>   | 0.05              | 1 (-5, 4)    | 3 (-17, 9)     | 2 (-1, 3)    | 4 (-3, 7)      |
|                      | 0.10              | 0 (-4, 4)    | -1 (-10, 10)   | 2 (0, 3)     | 3 (1, 6)       |
|                      | 0.25              | -2 (-9, 1)   | -2 (-23, 9)    | 1 (0, 5)     | 2 (0, 8)       |
|                      | 0.50              | -5 (-7, -1)  | -13 (-20, -1)  | 5 (2, 7)     | 7 (3, 13)      |
|                      | 0.75              | -6 (-11, -2) | -23 (-33, -3)  | 4 (-1, 7)    | 8 (-3, 13)     |
|                      | 0.90              | -16 (-18, 7) | -11 (-45, 13)  | 5 (0, 11)    | 9 (5, 18)      |
|                      | 0.95              | -15 (-23, 9) | -16 (-67, 26)  | 9 (-1, 17)   | 14 (-1, 24)    |
|                      | mean              | -7 (-14, -1) | -17 (-33, -15) | 1 (-4, 5)    | 7 (1, 13)      |
| MEP                  | 0.05              | 0 (-2, 0)    | -1 (-3, 0)     | -1 (-4, 1)   | -3 (-5, 3)     |
|                      | 0.10              | -1 (-2, 0)   | -2 (-4, 0)     | -1 (-3, 1)   | -2 (-5, 4)     |
|                      | 0.25              | -1 (-3, 0)   | -3 (-8, 1)     | 0 (-2, 2)    | 0 (-3, 2)      |
|                      | 0.50              | -3 (-5, 1)   | -2 (-16, 5)    | 1 (-2, 3)    | 2 (-5, 7)      |
|                      | 0.75              | -5 (-10, 2)  | -3 (-22, 11)   | 1 (-2, 3)    | 0 (-3, 4)      |
|                      | 0.90              | -12 (-15, 6) | -17 (-41, 12)  | 2 (-4, 9)    | 5 (-5, 13)     |
|                      | 0.95              | 1 (-2, 16)   | -20 (-40, 19)  | 3 (-6, 19)   | 3 (-8, 27)     |
|                      | mean              | -3 (-7, 1)   | -7 (-17, 4)    | 1 (-2, 3)    | 1 (-4, 6)      |

---

EARLI: Early Autism Risk Longitudinal Investigation Study, HOME: Health Outcomes and Measures of the Environment Study, SRS: Social Responsiveness Scale

MCPP, mono(3-carboxypropyl) phthalate; MiBP, mono-isobutyl phthalate; MBzP, monobenzyl phthalate; MBP, mono-n-butyl phthalate;  $\Sigma$ DEHP, summary di(2-ethylhexyl) phthalate metabolite measure; MEP, monoethyl phthalate

Phthalate metabolites are ordered based on median concentration values from left (lowest median concentrations) the right (highest median concentrations).

<sup>a</sup> Concentrations of  $\Sigma$ DEHP (in ng/mL) were calculated using the following formula:  $\Sigma$ DEHP (ng/mL) = [MECPP (ng/mL) /278 g/mol + MEHHP (ng/mL) /294.3 g/mol + MEOHP (ng/mL) /292.2 g/mol + MEHP (ng/mL) /278.3 g/mol] \*278 g/mol.

<sup>b</sup> Adjusted for maternal age (continuous), maternal race (white vs non-white), income (<\$30,000 vs \$30,000–\$75,000,  $\geq$  \$75,000), parity (continuous), and  $\log_{10}$ –transformed urine/serum cotinine concentrations (continuous). Note cotinine concentrations were ascertained from maternal urine in EARLI and serum in HOME.

<sup>c</sup> Adjusted for maternal age (continuous), maternal race (white vs non-white), income (<\$30,000 vs \$30,000–\$75,000,  $\geq$  \$75,000), parity (continuous),  $\log_{10}$ –transformed urine/serum cotinine concentrations (continuous), child sex, and child age. Note cotinine concentrations were ascertained from maternal urine in EARLI and serum in HOME.

<sup>d</sup> Positive coefficients for SRS indicate that maternal phthalate exposure is associated with more deficits in social responsiveness traits

<sup>e</sup> Results from linear regression analyses

**Table S10:** Adjusted differences (95% confidence intervals (CI)) in child SRS T-scores at 3 to 8 years per 10-fold increase in gestational urinary monobenzyl phthalate (MBzP) metabolite concentrations at quantiles of SRS T-scores <sup>c</sup>: the EARLI (2009–2012) and HOME Studies (2003–2006).

| Tau   | Primary Analysis | Quantile Regression Results: $\beta$ (95% CI) |                                 |                                 |                   |                                            |
|-------|------------------|-----------------------------------------------|---------------------------------|---------------------------------|-------------------|--------------------------------------------|
|       |                  | Adjusting for Child Sex                       | Adjusting for Child Age (Years) | Adjusting for Pre-pregnancy BMI | Adjusting for MBP | Adjusting for NICU admittance <sup>d</sup> |
| EARLI |                  |                                               |                                 |                                 |                   |                                            |
| 0.05  | -1 (-2, 1)       | -1 (-2, 1)                                    | -1 (-2, 1)                      | -1 (-3, 1)                      | 0 (-2, 2)         |                                            |
| 0.10  | -1 (-2, 1)       | -1 (-2, 1)                                    | 0 (-2, 6)                       | -1 (-4, 1)                      | 0 (-1, 2)         |                                            |
| 0.25  | -2 (-5, 1)       | -2 (-5, 2)                                    | -2 (-5, 2)                      | -2 (-4, 2)                      | 1 (-4, 3)         |                                            |
| 0.50  | -1 (-5, 1)       | -2 (-4, 2)                                    | -2 (-5, 0)                      | -2 (-4, 2)                      | 1 (-3, 3)         |                                            |
| 0.75  | -1 (-4, 4)       | -1 (-4, 4)                                    | -2 (-5, 3)                      | 0 (-7, 3)                       | 2 (-3, 8)         |                                            |
| 0.90  | 1 (-10, 10)      | 0 (-5, 4)                                     | 2 (-10, 10)                     | 0 (-10, 10)                     | 14 (-8, 20)       |                                            |
| 0.95  | 3 (-9, 8)        | 2 (-3, 7)                                     | 3 (-6, 5)                       | 0 (-7, 7)                       | 13 (-7, 22)       |                                            |
| HOME  |                  |                                               |                                 |                                 |                   |                                            |
| 0.05  | 1 (-1, 3)        | 1 (-1, 2)                                     | 0 (-2, 2)                       | 1 (-1, 2)                       | 1 (-2, 3)         | 1 (-2, 2)                                  |
| 0.10  | 1 (-1, 2)        | 1 (-1, 2)                                     | 1 (-1, 1)                       | 1 (-1, 2)                       | 1 (0, 2)          | 1 (-3, 2)                                  |
| 0.25  | 0 (-1, 3)        | 0 (-1, 3)                                     | 0 (-1, 4)                       | 1 (-2, 3)                       | 0 (-2, 4)         | 1 (-2, 3)                                  |
| 0.50  | 1 (-3, 4)        | 1 (-2, 4)                                     | 1 (-2, 4)                       | 1 (-2, 4)                       | 2 (-3, 5)         | 1 (-3, 3)                                  |
| 0.75  | 1 (-2, 5)        | 0 (-3, 4)                                     | 1 (-3, 3)                       | 1 (-2, 3)                       | 1 (-2, 6)         | 0 (-3, 3)                                  |
| 0.90  | 5 (-2, 10)       | 4 (0, 8)                                      | 4 (0, 10)                       | 5 (-2, 9)                       | 5 (0, 9)          | 5 (-2, 11)                                 |
| 0.95  | 10 (2, 14)       | 9 (4, 13)                                     | 7 (-2, 11)                      | 7 (6, 15)                       | 7 (2, 12)         | 10 (3, 14)                                 |

EARLI: Early Autism Risk Longitudinal Investigation Study, HOME: Health Outcomes and Measures of the Environment Study, SRS: Social Responsiveness Scale, BMI: body mass index, MBzP: monobenzyl phthalate, MBP: mono-n-butyl phthalate, NICU: Neonatal Intensive Care Unit

<sup>a</sup> Concentrations of  $\Sigma$ DEHP (in ng/mL) were calculated using the following formula:  $\Sigma$ DEHP (ng/mL) = [MECPP (ng/mL) /278 g/mol + MEHHP (ng/mL) /294.3 g/mol + MEOHP (ng/mL) /292.2 g/mol + MEHP (ng/mL) /278.3 g/mol] \*278 g/mol.

<sup>b</sup> Adjusted for maternal age (continuous), maternal race (white vs non-white), income (<\$30,000 vs \$30,000–\$75,000,  $\geq$  \$75,000), parity (continuous), and  $\log_{10}$ -transformed urine/serum cotinine concentrations (continuous). Note cotinine concentrations were ascertained from maternal urine in EARLI and serum in HOME. In the pooled cohort model, adjusted for smoking during pregnancy as a binary variable. The pooled results are adjusted for cohort.

<sup>c</sup> Positive coefficients for SRS indicate that maternal phthalate exposure is associated with more deficits in social responsiveness traits.

<sup>d</sup> NICU admittance information was only available for a subset of participants ( n= 265) in the HOME Study only, of which only n = 14 (5%) of HOME Study participants were admitted to the NICU

**Figure S1.** Flow chart of participant selection to final sample size

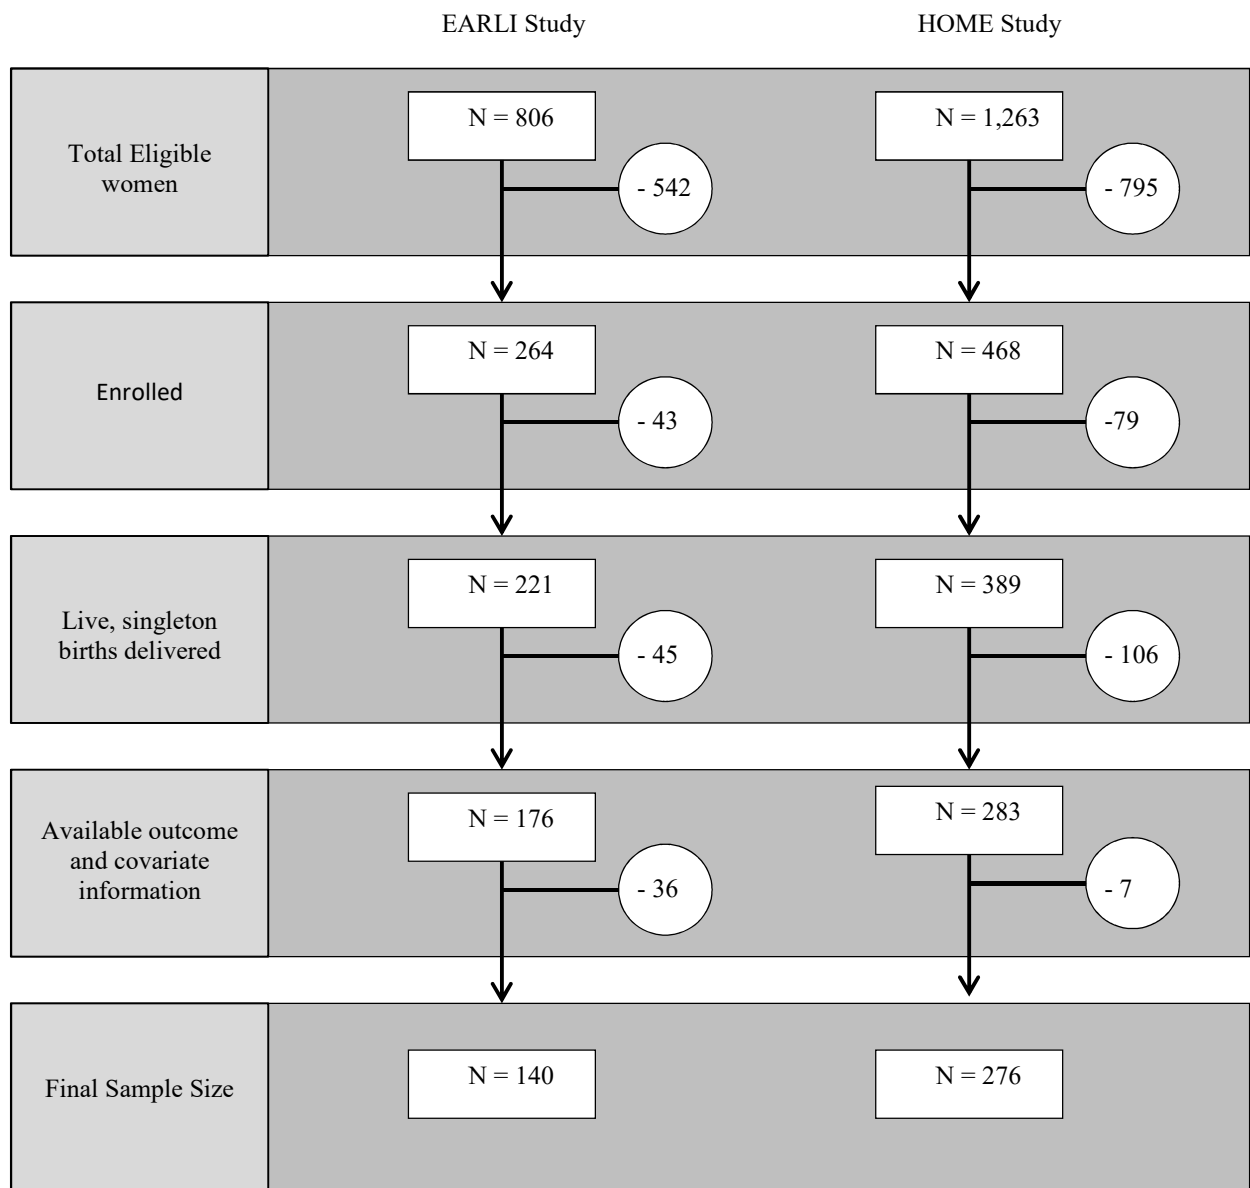

**Figure S2.** Directed acyclic graph used to select covariates for our primary analysis in the association between maternal urinary phthalate concentrations during gestation and child SRS scores

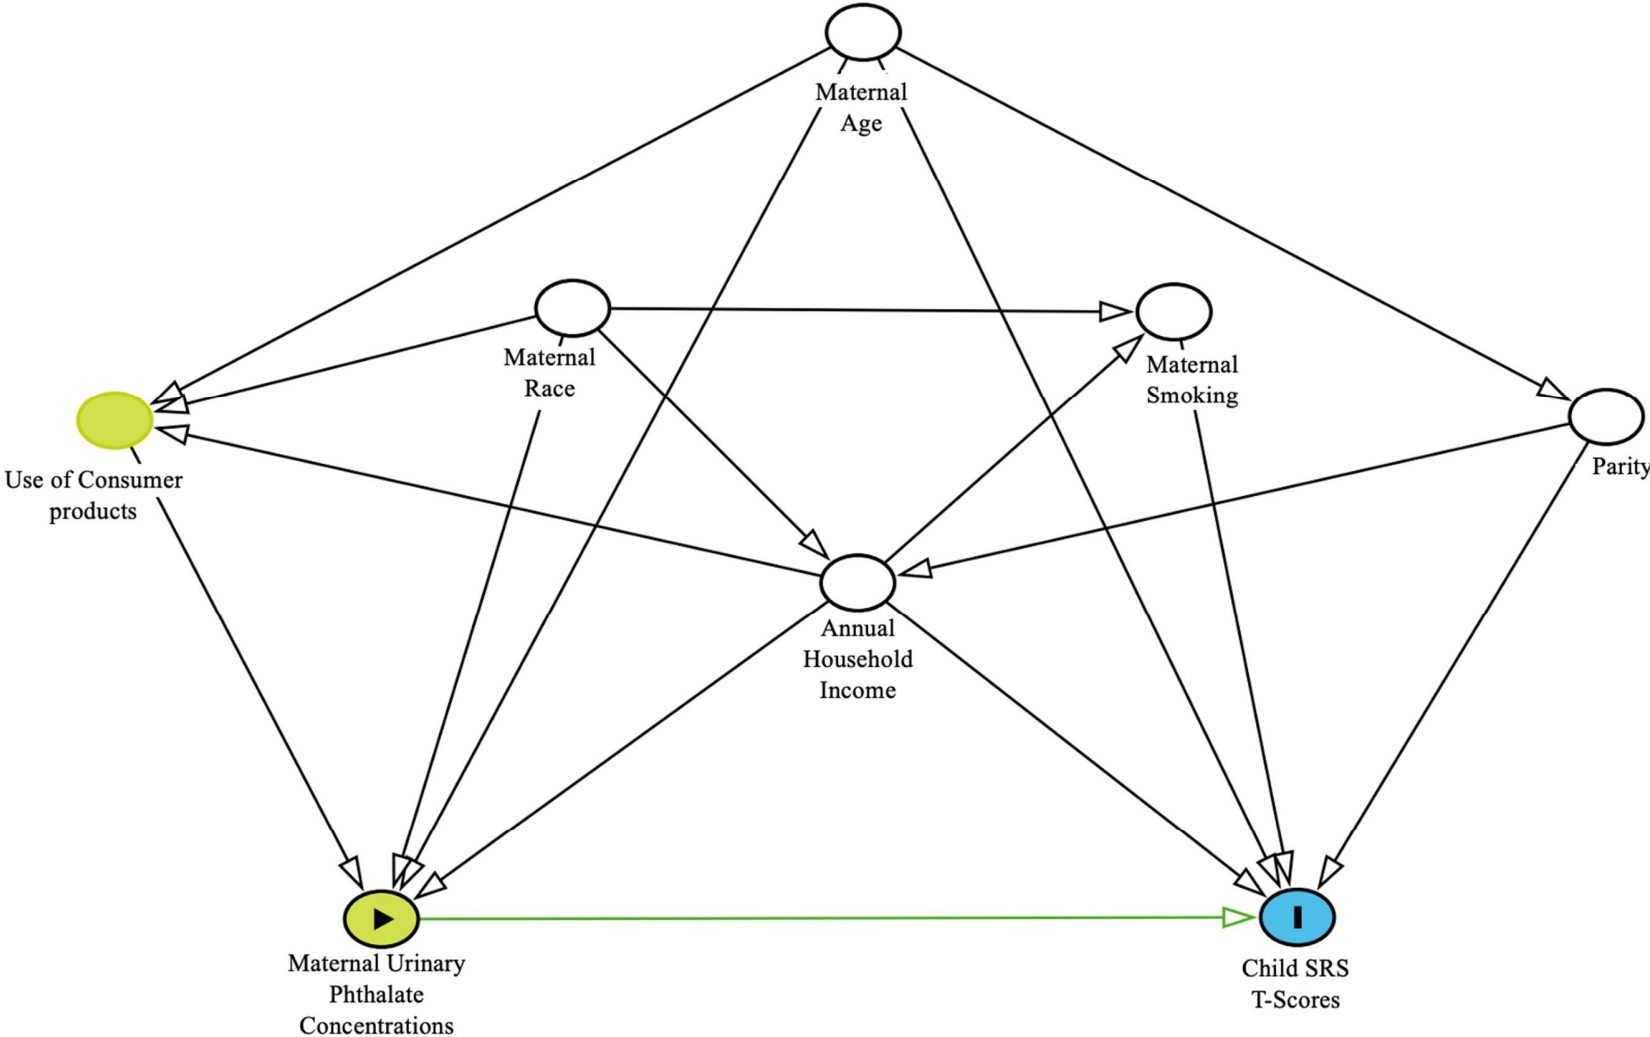

**Figure S3.** Directed acyclic graph used to select covariates for our primary and secondary analysis in the association between maternal urinary phthalate concentrations during gestation and child SRS scores

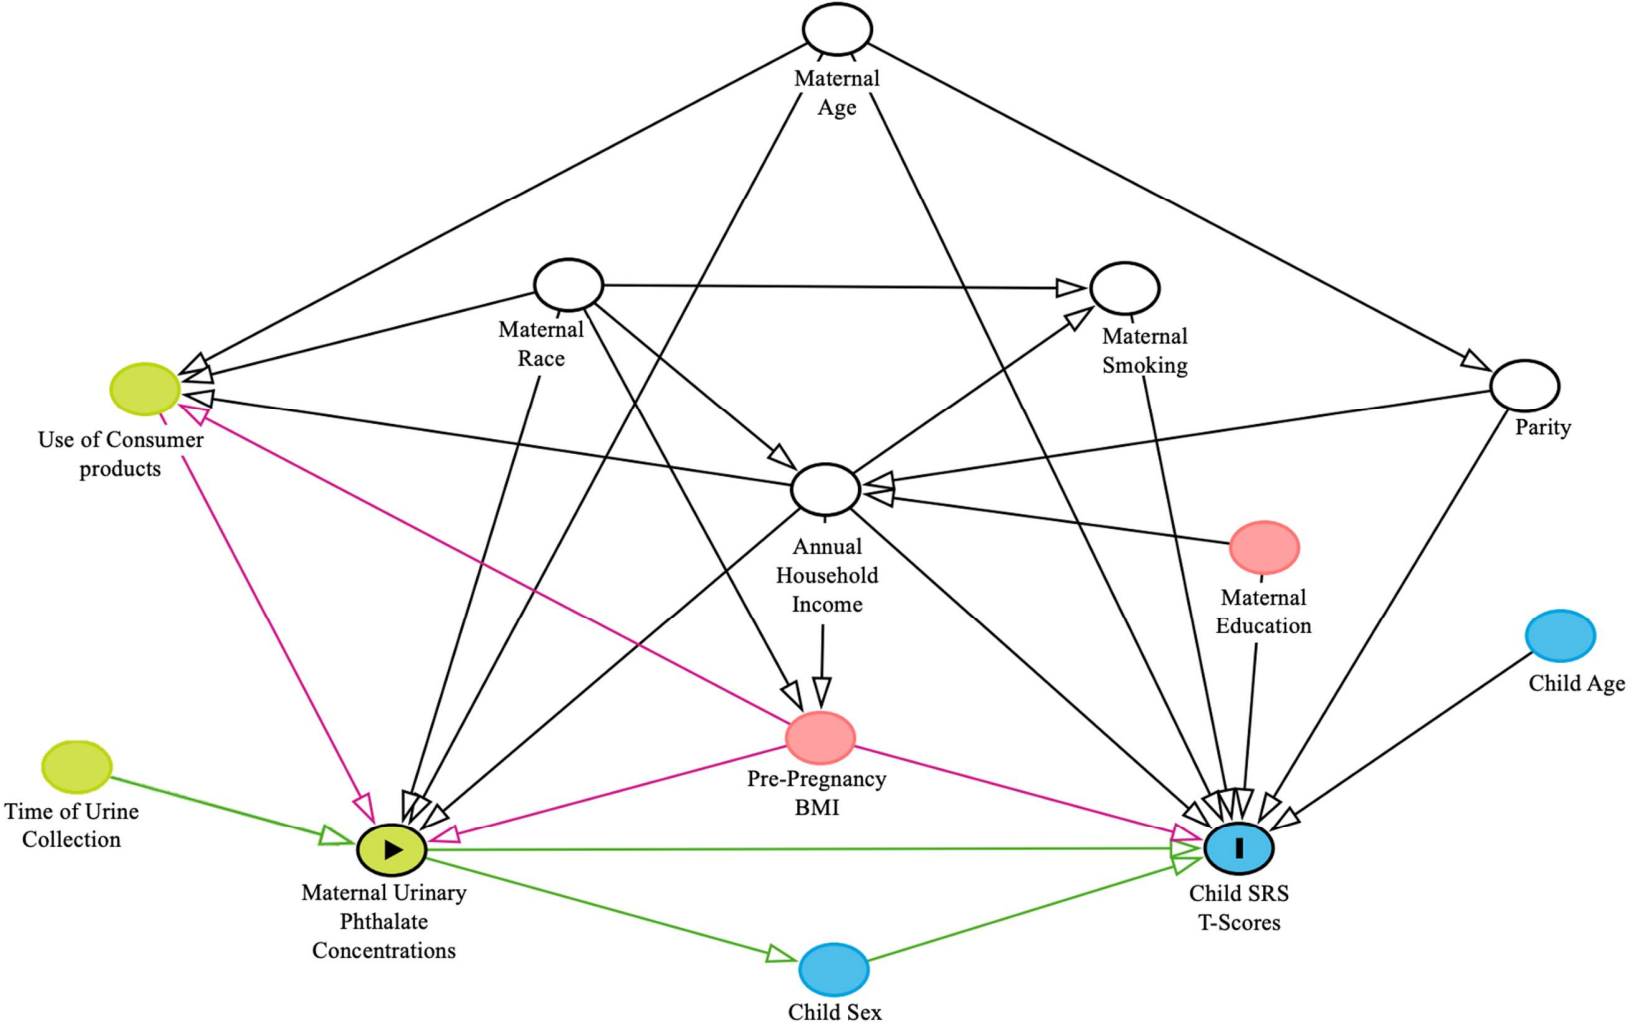

**Figure S4.** Kernel density plot of distributions of Children’s SRS T-Score at Ages 3 to 8: the EARLI (2009–2012) and HOME Studies (2003–2006).

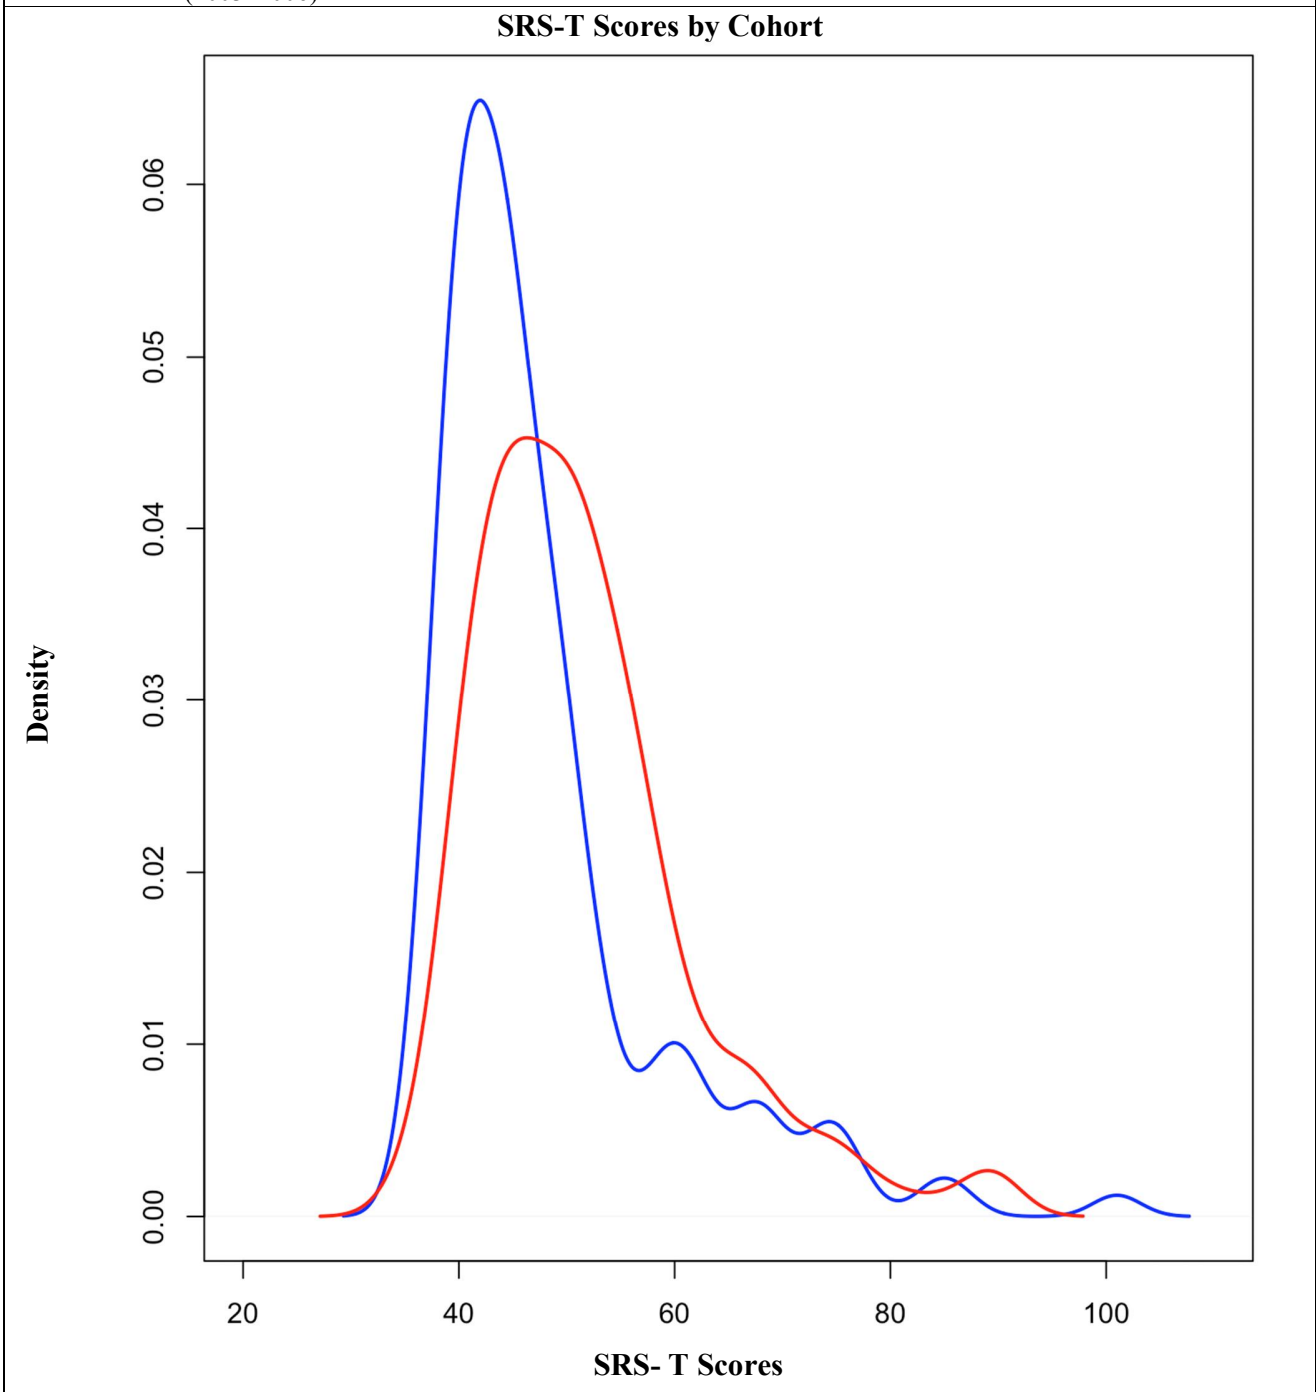

<sup>a</sup> The central tendencies of child SRS T-scores were similar in EARLI (mean: 48, SD: 11) and HOME (mean: 51, SD: 10)  
<sup>b</sup> The proportion of children with SRS scores  $\geq 60$  were similar in EARLI (17/140; 12%) and HOME (47/273; 17%)  
<sup>c</sup> The proportion of children with SRS scores  $\geq 75$  were similar in EARLI (6/140; 4%) and HOME (12/273; 4%)  
<sup>d</sup> SRS T-scores ranging from 60–75 are indicative of clinically significant deficiencies in reciprocal social behavior that may interfere with daily social interactions, while scores greater than 75 are strongly associated with clinical diagnosis of ASD

**Figure S5.** Adjusted differences in children's SRS T-scores at ages 3 to 8 per 10-fold increase in gestational urinary phthalate metabolite concentrations using quantile regression: the EARLI (2009–2012) and HOME Studies (2003–2006).

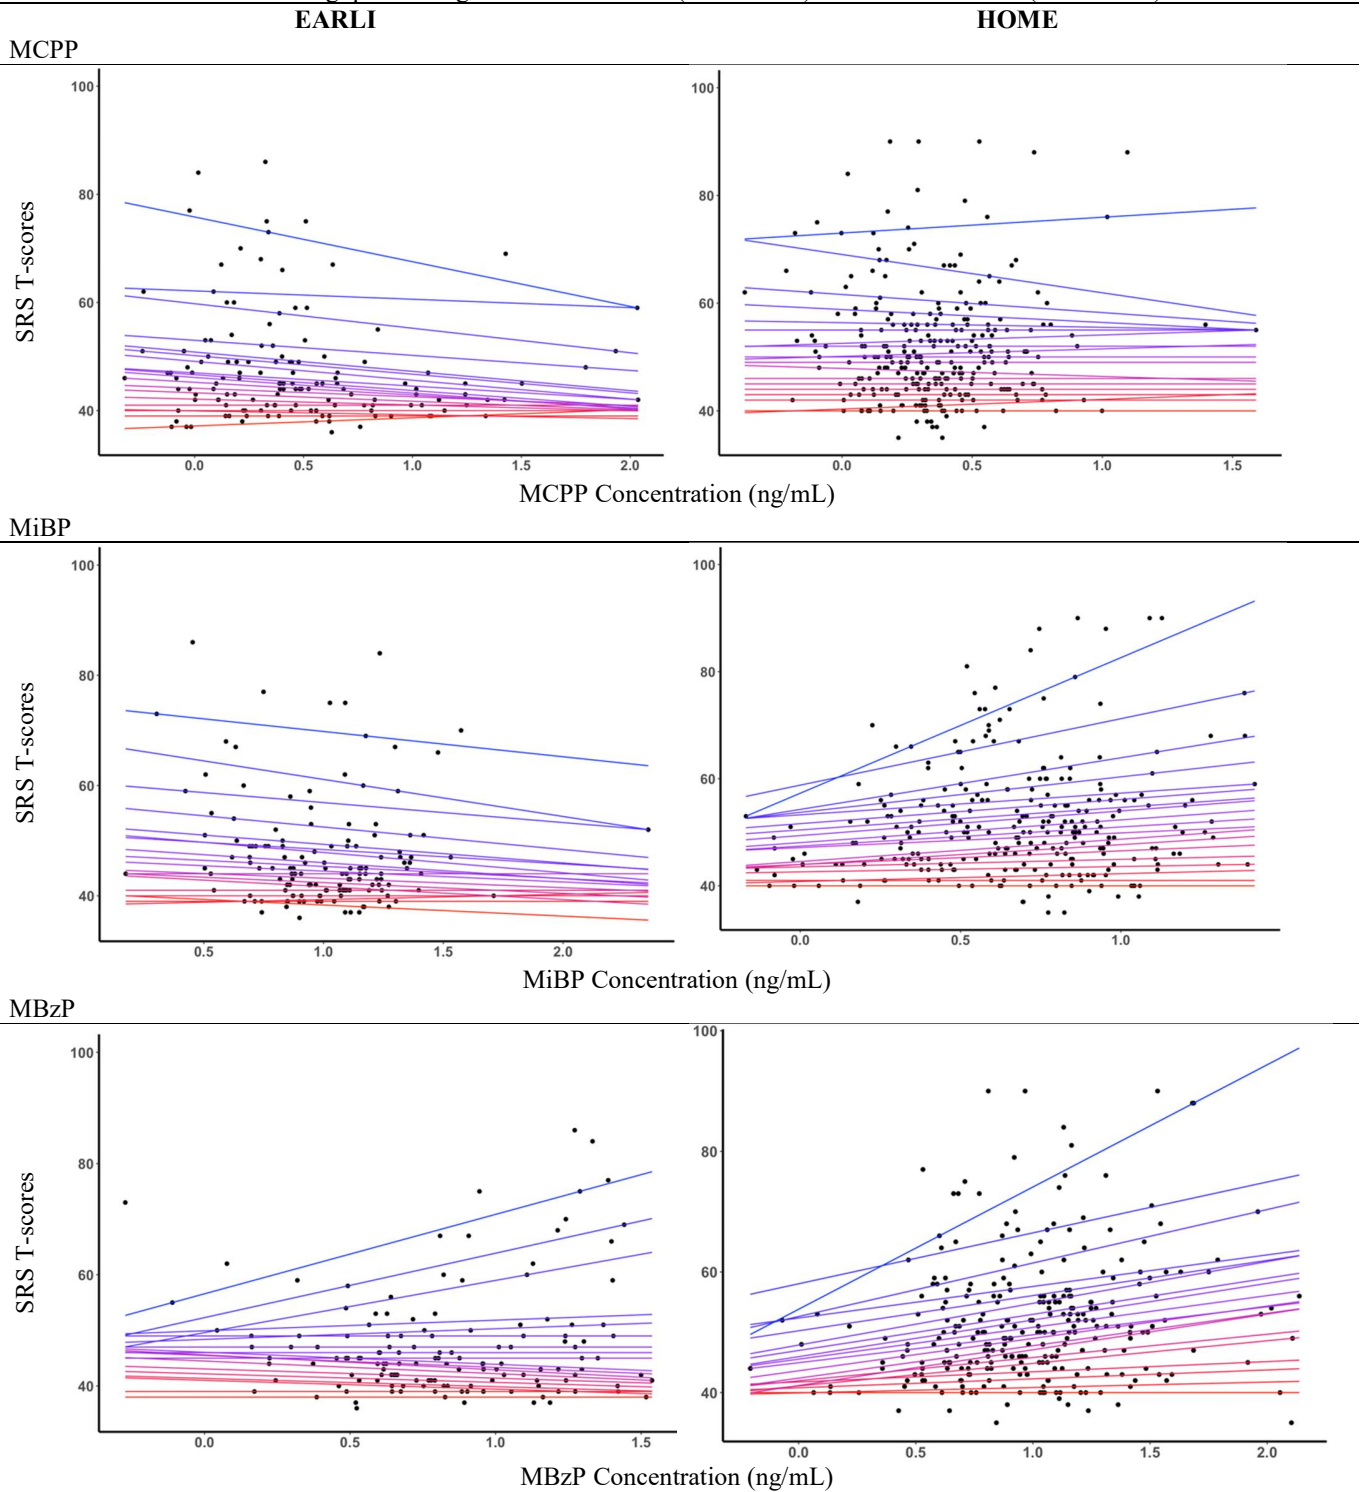

**Figure S5.** Continued



**EARLI** **HOME**

MBP

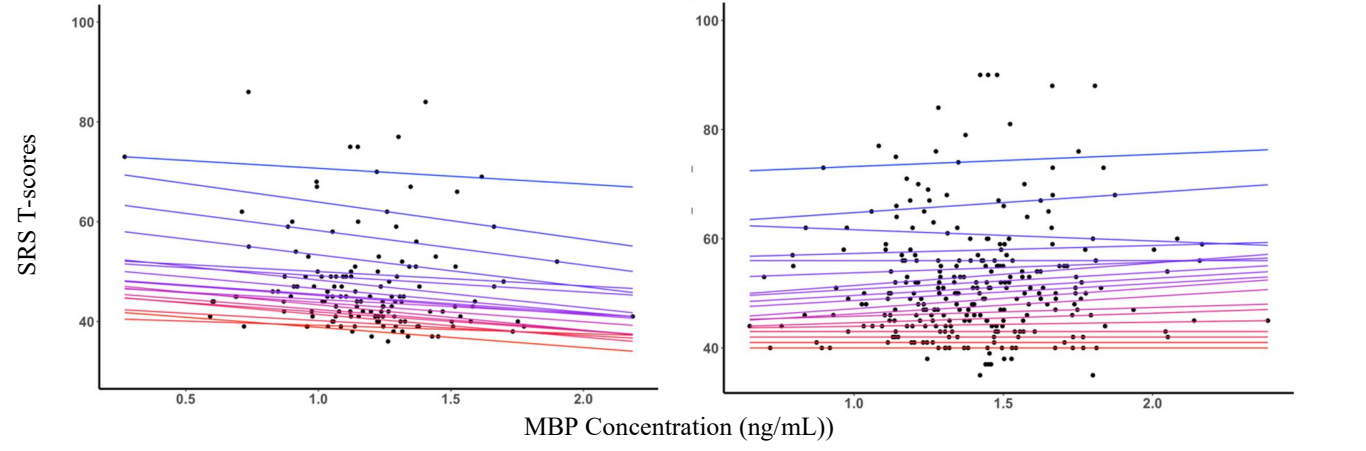

$\Sigma$ EDEHP

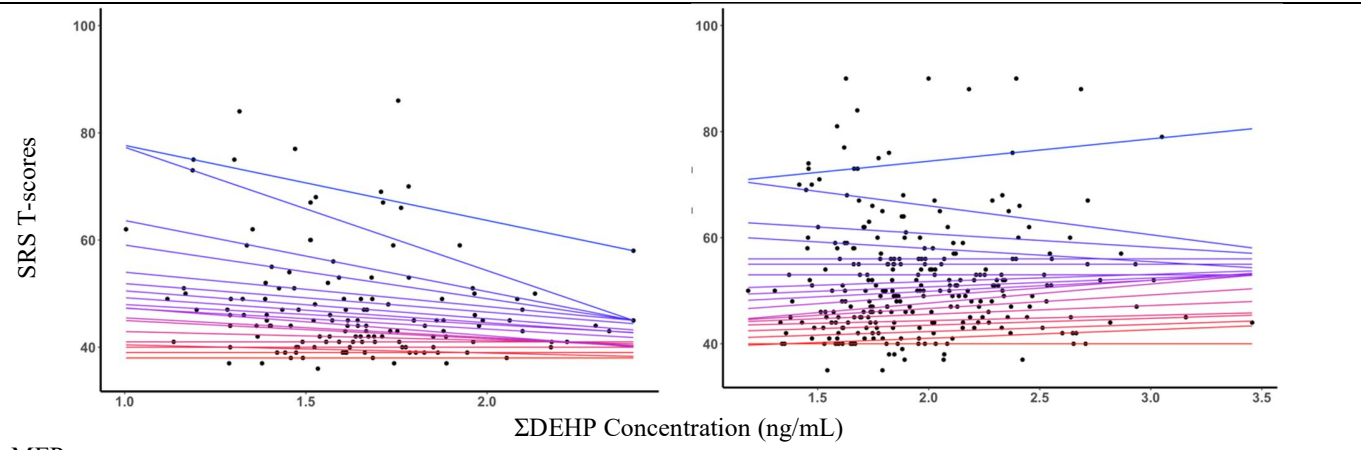

MEP

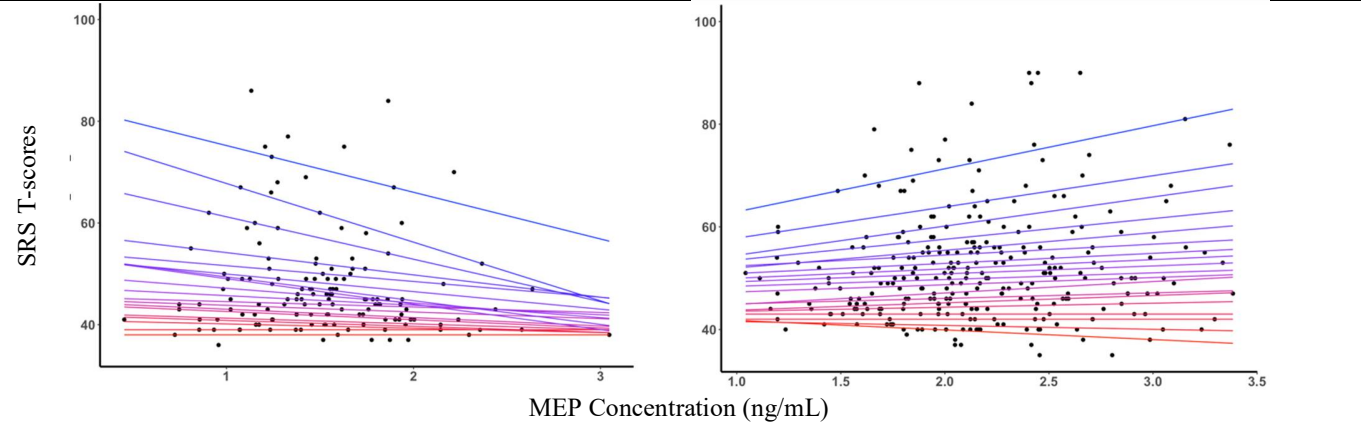

| Quantile | 0.25 | 0.50 | 0.75 |
|----------|------|------|------|
|          |      |      |      |

EARLI: Early Autism Risk Longitudinal Investigation Study, HOME: Health Outcomes and Measures of the Environment Study, SRS: Social Responsiveness Scale, MCP: mono(3-carboxypropyl) phthalate; MiBP: mono-isobutyl phthalate; MBzP: monobenzyl phthalate; MBP: mono-n-butyl phthalate; ΣDEHP: summary di(2-ethylhexyl) phthalate metabolite measure; MEP, monoethyl phthalate

Phthalate metabolites are ordered based on median concentration values from left (lowest median concentrations) the right (highest median concentrations).

<sup>a</sup> Concentrations of ΣDEHP (in ng/mL) were calculated using the following formula: ΣDEHP (ng/mL) = [MECPP (ng/mL) /278 g/mol + MEHHP (ng/mL) /294.3 g/mol + MEOHP (ng/mL) /292.2 g/mol + MEHP (ng/mL) /278.3 g/mol] \*278 g/mol.

<sup>b</sup> Adjusted for maternal age (continuous), maternal race (white vs non-white), income (<\$30,000 vs \$30,000–\$75,000, ≥ \$75,000), parity (continuous), and log<sub>10</sub>–transformed urine/serum cotinine concentrations (continuous). Note cotinine concentrations were ascertained from maternal urine in EARLI and serum in HOME.

<sup>c</sup> Positive coefficients for SRS indicate that maternal phthalate exposure is associated with more deficits in social responsiveness traits

<sup>d</sup> Quantile sequence 0.05–0.95 by 0.05
